# Supplementary material for: Unraveling the photophysical characteristics and biological applications of vinyl sulfones as viscosity sensors
Source: Royal Society of Chemistry journal article supplement (doi:10.1039/d3ra02354k), 2023-01-01
Supplement: d3ra02354k1.pdf [file d3ra02354k1.pdf]

## *Supporting Information*

# **Unraveling the Photophysical Characteristics and Biological Applications of Vinyl Sulfones as Viscosity Sensors**

Onnicha Khaikate,<sup>a</sup> Thitima Pewklang,<sup>a</sup> Tunyawat Khrootkaew,<sup>a</sup> Kantapat Chansaenpak,<sup>b</sup> Prapassara Muangsopa,<sup>a</sup> Chutima Kuhakarn,<sup>c</sup> Anyanee Kamkaew<sup>a,\*</sup>

<sup>a</sup>*School of Chemistry, Institute of Science, Suranaree University of Technology, Nakhon Ratchasima 30000, Thailand.*

<sup>b</sup>*National Nanotechnology Center, National Science and Technology Development Agency, Thailand Science Park, Pathum Thani 12120, Thailand.*

<sup>c</sup>*Department of Chemistry and Center of Excellence for Innovation in Chemistry (PERCH-CIC), Faculty of Science, Mahidol University, Rama 6 Road, Bangkok 10400, Thailand.*

\*E-mail: anyanee@sut.ac.th

---

### **Table of Contents**

|                                                                                                    | <b>Page</b> |
|----------------------------------------------------------------------------------------------------|-------------|
| <b>General information</b>                                                                         | <b>S3</b>   |
| <b>Materials and methods</b>                                                                       | <b>S3</b>   |
| <b>General procedure for the synthesis of vinyl sulfones-NO<sub>2</sub> (3)</b>                    | <b>S7</b>   |
| <b>General procedure for the synthesis of vinyl sulfones-NH<sub>2</sub> (4)</b>                    | <b>S8</b>   |
| <b>Characterization data of vinyl sulfones-NO<sub>2</sub> (3)</b>                                  | <b>S9</b>   |
| <b>Characterization data of vinyl sulfones-NH<sub>2</sub> (4)</b>                                  | <b>S11</b>  |
| <b>Copies of <sup>1</sup>H and <sup>13</sup>C NMR spectra of vinyl sulfones-NO<sub>2</sub> (3)</b> | <b>S13</b>  |
| <b>Copies of <sup>1</sup>H and <sup>13</sup>C NMR spectra of vinyl sulfones-NH<sub>2</sub> (4)</b> | <b>S17</b>  |
| <b>HRMS spectra of vinyl sulfones-NH<sub>2</sub> (4)</b>                                           | <b>S21</b>  |
| <b>Absorption and emission spectroscopic analyses</b>                                              | <b>S22</b>  |
| <b>Solvatochromism</b>                                                                             | <b>S28</b>  |
| <b>DFT calculation</b>                                                                             | <b>S29</b>  |

|                                                                                  |            |
|----------------------------------------------------------------------------------|------------|
| <b>Cytotoxicity assays</b>                                                       | <b>S30</b> |
| <b>Confocal images of HepG2 cells and corrected total cell fluorescence data</b> | <b>S31</b> |
| <b>Confocal images of HEK-293</b>                                                | <b>S33</b> |
| <b>References</b>                                                                | <b>S33</b> |

## General information

Commercially available chemicals were purchased in high quality and were used without further purification. The reactions were monitored by thin layer chromatography (TLC) carried out on silica gel plates (60 F<sub>254</sub>, MERCK, Germany) and visualized by a dual short ( $\lambda = 254$  nm) / long ( $\lambda = 366$  nm) wavelength UV lamp. Column chromatography was performed with silica gel 60 (particle size 0.06–0.2 mm; 70–230 mesh ASTM). <sup>1</sup>H-NMR and <sup>13</sup>C-NMR spectra were recorded with Bruker AVANCE 500 (500 MHz) spectrometer. Spectra were evaluated in first order and coupling constants *J* are reported in Hertz (Hz). Splitting patterns for the spin multiplicity of the signals in the spectra are given as the following: s = singlet, d = doublet, t = triplet, m = multiplet, dd = doublet of doublet and combinations thereof. Chemical shifts for <sup>1</sup>H-NMR were reported as  $\delta$ , parts per million (ppm), relative to the signal of CHCl<sub>3</sub> at 7.26 ppm and signal of DMSO-d<sub>6</sub> at 2.50. Chemical shifts for <sup>13</sup>C-NMR were reported as  $\delta$ , parts per million (ppm), relative to the signal of CHCl<sub>3</sub> at 77.16 ppm and signal of DMSO-d<sub>6</sub> at 39.52. Mass spectrometry was measured under ESI conditions.

## Materials and methods

### Spectroscopic materials and methods

#### *Absorption and fluorescence spectroscopic analyses*

All UV-vis absorption and fluorescence spectra were recorded on a UV-vis spectrophotometer (Agilent Technologies Cary 300) and a spectrofluorometer (PerkinElmer LS55), respectively. In both analyses, stock solutions of vinyl sulfones-NO<sub>2</sub> (**3a–3d**) and vinyl sulfones-NH<sub>2</sub> (**4a–4d**) (3 mM) were prepared in DMSO. A suitable amount of the stock solution was added to various solvents including toluene, chloroform, tetrahydrofuran (THF), dichloromethane (DCM), dimethyl sulfoxide (DMSO), *N,N*-dimethylformamide (DMF), acetone, acetonitrile (MeCN), methanol (MeOH), DI water and 10 mM PBS buffer (pH 7.4) (3 mL) to obtain the final concentration of 10  $\mu$ M in the working solutions. For fluorescence experiments, the emission spectra were recorded at the excitation wavelength of each compound's absorption maximum wavelength. The fluorescence quantum yields ( $\Phi_f$ ) were calculated relative to quinine sulfate in 0.1 M H<sub>2</sub>SO<sub>4</sub> as a standard ( $\Phi_f = 0.54$ ).

### ***Fluorescence response to solvent viscosity***

Each vinyl sulfones-NH<sub>2</sub> (**4a–4d**) (5 μM) was dissolved in water/glycerol mixtures (0–100 % v/v). Then, a spectrofluorometer (PerkinElmer LS55) was used to analyze the prepared solutions. The emission spectra were recorded at an excitation wavelength of 315 nm. The fluorescence quantum yields (Φ<sub>f</sub>) were estimated relative to quinine sulfate in 0.1 M H<sub>2</sub>SO<sub>4</sub> as a standard (Φ<sub>f</sub> = 0.54), using the equation below.

$$\Phi_f = \Phi_{std} \times \left( \frac{A_{sample}}{A_{std}} \right) \times \left( \frac{I_{std}}{I_{sample}} \right) \times \left( \frac{\eta_{sample}}{\eta_{std}} \right)^2$$

where Φ denotes fluorescence quantum yield, A = a peak area of emission, I = an absorbance at the excitation wavelength, and η stands for solvent reflective index.

### ***pH effects of vinyl sulfones-NH<sub>2</sub> (4a–4d) by fluorescence spectroscopic analysis***

Vinyl sulfones-NH<sub>2</sub> (**4a–4d**) (10 μM) was dissolved in commercial pH 1–12 buffers (Merck, St. Louis, MO, USA; phosphoric acid (H<sub>3</sub>PO<sub>4</sub>) for pH 1.08–3.05, acetic acid (CH<sub>3</sub>COOH) for pH 4.05–5.02, potassium dihydrogen phosphate (KH<sub>2</sub>PO<sub>4</sub>) for pH 6.00–9.16, potassium hydrogen phosphate (KH(PO<sub>4</sub>)<sup>2-</sup>) for pH 10.08–12.00. The actual pH values of the prepared buffer solutions were measured by a pH meter. The resulting solutions were examined using a spectrofluorometer.

### ***Photo-Stability test***

Vinyl sulfones-NH<sub>2</sub> (**4a–4d**) (10 μM) was dissolved in DMSO for measurement of the absorption and emission intensity. The prepared solutions of **4a–4d** were irradiated by 100 W UV light (365 nm) at room temperature with a distance of 30 cm. The UV-vis absorption and fluorescence spectra of the solutions were measured at different time points including 0, 5, 10, 15, 20, and 30 min by UV-Vis microplate reader (Thermo Scientific Multiskan GO) and fluorescence microplate reader (ThermoScientific Varioskan LUX), respectively. The photo-stability was represented as photobleaching absorption and emission (%) determined from the change in intensity of absorption and emission at the maxima of absorption and emission before and after irradiation.

### **Computational calculation**

The frontier molecular orbitals of **3a** and **4a–4d** are calculated by density functional theory (DFT) calculations at the B3LYP/6-311G level using the Turbomole program. The geometrical structure of the electronic ground states was optimized by considering the continuum solvation model (CSM) in the Conductor-like Screening Model (COSMO), using gas ( $\epsilon = 1$ ) and water ( $\epsilon = 78$ ) as the solvent.

### **Methods for in vitro assays**

#### ***Cell culture***

Human liver hepatocellular carcinoma (HepG2) and human embryonic kidney 293 (HEK-293) cell lines were cultured on 75 cm<sup>3</sup> culture flasks in Dulbecco's Modified Eagle's Media (DMEM, Hyclone) supplemented with 10% fetal bovine serum (Gibco) and 1% penicillin–streptomycin (Corning). The cells were maintained at 37 °C in a humidified atmosphere containing 5% of CO<sub>2</sub>.

#### ***Cell viability***

The cells were seeded on a 96-well cell culture plate at approximately  $1.5 \times 10^4$  cells per/well for 24 h. Then, the cells were incubated with 0, 2.5, 5, 10, 20, 30, 40, and 50  $\mu\text{M}$  of vinyl sulfones-NO<sub>2</sub> (**3a–3d**) and vinyl sulfones-NH<sub>2</sub> (**4a–4d**) for 24 h. After incubation, the cells were washed with 0.01 M of PBS pH 7.4 twice before adding 0.5 mg/mL of MTT reagent (Methylthiazolyldiphenyl-tetrazolium bromide, Sigma-Aldrich) in 0.01 M of PBS pH 7.4 solution for 2.5 h. After solution removal, DMSO was added to dissolve the formazan product and detected through UV-vis absorption of formazan at wavelength 560 nm (BMG Labtech/SPECTROstar Nano microplate reader).

#### ***Cell imaging***

For the time-dependent assay, approximately  $1 \times 10^4$  cells of HepG2 or HEK-293 were seeded on an 8-well Chambered Coverglass (LabTek, Nunc) for 24 h. Then, the cells were incubated with 20  $\mu\text{M}$  of vinyl sulfones-NO<sub>2</sub> (**3a–3d**) and vinyl sulfones-NH<sub>2</sub> (**4a–4d**) for 0, 1, and 6 h. After incubation, the cells were washed with 0.01 M PBS buffer twice. The cells were

visualized under a 60x oil immersion objective lens by Laser Scanning Confocal Microscope (Nikon A1Rsi) with a 405 nm laser.

For the dose-dependent assay, approximately  $1 \times 10^4$  cells of HepG2 were seeded on an 8-well Chambered Coverglass (LabTek, Nunc) for 24 h. Then, the cells were incubated with 0, 10, and 20  $\mu\text{M}$  of vinyl sulfones- $\text{NO}_2$  (**3a–3d**) and vinyl sulfones- $\text{NH}_2$  (**4a–4d**) for 6 h. After incubation, the cells were washed with 0.01 M PBS buffer twice. The cells were visualized under a 60x oil immersion objective lens by Laser Scanning Confocal Microscope (Nikon A1Rsi) with 405 nm laser.

For the co-localization assay, approximately  $1 \times 10^4$  cells of HepG2 were seeded on 8-well Chambered Coverglass (LabTek, Nunc) for 24 h. After incubation, the cells were incubated with 20  $\mu\text{M}$  of **4c** and **4d** for 6 h. Then, the cells were washed with 0.01 M PBS buffer twice and were treated with media containing 1.0  $\mu\text{M}$  of MitoTracker™ Green FM (Thermo Fisher Scientific), LysoTracker™ Green DND-26 (Thermo Fisher Scientific), ER-Tracker™ Green (BODIPY™ FL Glibenclamide, Thermo Fisher Scientific), and C6-NBD Ceramide (Golgi tracker, Avanti Polar Lipids) for 10 min. The cells were visualized under 60x oil immersion objective lens by Laser Scanning Confocal Microscope (Nikon A1Rsi) with 405 nm laser and 488 nm laser (MitoTracker, LysoTracker, Golgi tracker, and ER tracker), and Pearson's correlation coefficient for colocalization of **4c** and **4d** with organelles trackers was obtained from ImageJ.

For the viscosity assay, approximately  $1 \times 10^4$  cells of HepG2 were seeded on 8-well Chambered Coverglass (LabTek, Nunc) for 24 h. After incubation, the cells were incubated with 20  $\mu\text{M}$  of **4c** and **4d** for 1 h. Then, the cells were washed with 0.01 M PBS buffer twice. To induce mitochondria swelling, the cells were pretreated with nystatin (20  $\mu\text{M}$ ) for 30 min at 37 °C before **4c** and **4d** (20  $\mu\text{M}$ ) staining and incubated for 1 h at 37 °C. The cells were visualized under a 60x oil immersion objective lens by Laser Scanning Confocal Microscope (Nikon A1Rsi) with a 405 nm laser.

### *Statistical analysis*

The mean of three distinct observations ( $n = 3$ ) and the standard deviation (mean  $\pm$  SD) from three separate experiments are used to present the data. The Student's T-test was used for the

statistical analysis. P values of < 0.05 were considered significant (\*P < 0.05, \*\*P < 0.01, \*\*\*P < 0.001).

### General procedures for the synthesis of vinyl sulfones-NO<sub>2</sub> (3)<sup>1</sup>

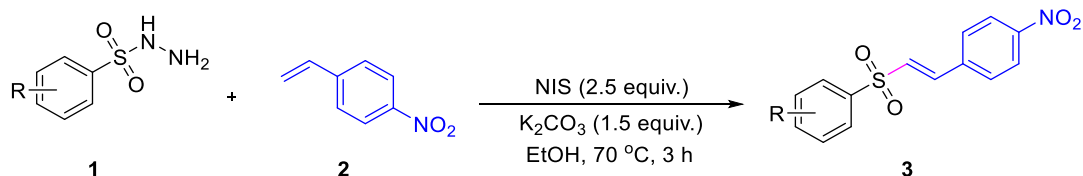

To a solution of sulfonyl hydrazide **1** (1.5 mmol, 1.5 equiv.), 4-nitrostyrene **2** (0.13 mL, 1.0 mmol, 1.0 equiv.), and K<sub>2</sub>CO<sub>3</sub> (0.2073 g, 1.5 mmol, 1.5 equiv.) in EtOH (5 mL) were added slowly, portion-wise NIS (0.2073 g, 2.5 mmol, 2.5 equiv.) at room temperature. Then, the reaction mixture was allowed to stir at 70 °C for 3 h. The reaction was cooled to room temperature and EtOH was evaporated under reduced pressure. The crude mixture was diluted in EtOAc (5 mL) and quenched with sat. Na<sub>2</sub>S<sub>2</sub>O<sub>3</sub> (5 mL), and the resulting mixture was extracted with EtOAc (3 × 10 mL). The combined organic layers were washed with brine (20 mL), dried (anh. MgSO<sub>2</sub>), filtered, and concentrated under reduced pressure. The crude product was purified by column chromatography on silica gel (EtOAc/hexanes) to yield the corresponding vinyl sulfones-NO<sub>2</sub> (**3a–3d**).

### General procedure for the synthesis of vinyl sulfones (4)

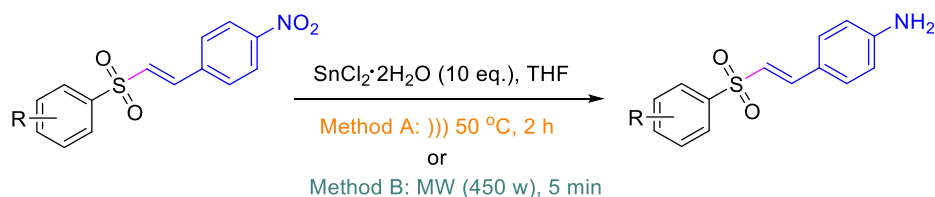

**Method A:** To a vial filled with vinyl sulfones-NO<sub>2</sub> (**3**, 0.2 mmol, 1.0 equiv.) and SnCl<sub>2</sub>·2H<sub>2</sub>O (451 mg, 2.0 mmol, 10.0 equiv.) was diluted with THF (1 mL). The reaction mixture was sonicated at 50 °C for 2 h, then extracted with EtOAc (3 × 10 mL) and washed with brine (20 mL). The organic layer was dried (anh. MgSO<sub>4</sub>), filtered, and concentrated under reduced pressure. The crude product was purified by column chromatography on silica gel (EtOAc/hexanes or DCM/MeOH) to provide the corresponding compounds **4**.

**Method B:** To crimp-sealed thick-walled glass tube containing vinyl sulfones-NO<sub>2</sub> (**3**, 0.2 mmol, 1.0 equiv.) and SnCl<sub>2</sub>·2H<sub>2</sub>O (451 mg, 2.0 mmol, 10.0 equiv.) was diluted with THF (1 mL). The sealed reaction tube was irradiated by microwave (power 450 W) for 5 min. After completion of the reaction, the reaction mixture was extracted with EtOAc (3 × 10 mL) and washed with brine (20 mL). The organic layer was dried (anh. MgSO<sub>4</sub>), filtered, and concentrated under reduced pressure. The crude product was purified by column chromatography on silica gel (EtOAc/hexanes or DCM/MeOH) to provide the corresponding compounds **4**.

### Characterization data of vinyl sulfones-NO<sub>2</sub> (**3**)

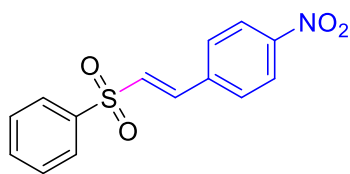

### (*E*)-1-nitro-4-(2-(phenylsulfonyl)vinyl)benzene (**3a**)<sup>2</sup>

Purification by column chromatography (EtOAc/hexanes, 1:4 v/v) afforded **3a** (0.2257 g, 78%); pale yellow solid; <sup>1</sup>H NMR (CDCl<sub>3</sub>, 500 MHz): δ 8.24 (d, *J* = 8.7 Hz, 2H), 7.96 (d, *J* = 7.5 Hz, 2H), 7.72 (d, *J* = 15.5 Hz, 1H), 7.67–7.64 (m, 3H), 7.58 (t, *J* = 7.7 Hz, 2H), 7.02 (d, *J* = 15.5 Hz, 1H); <sup>13</sup>C{<sup>1</sup>H} NMR (CDCl<sub>3</sub>, 125 MHz): δ 149.1, 139.9, 139.4, 138.5, 134.0, 131.9, 129.7, 129.4, 128.0, 124.4 ppm.

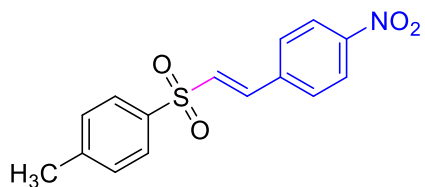

### (*E*)-1-methyl-4-((4-nitrostyryl)sulfonyl)benzene (**3b**)<sup>2</sup>

Purification by column chromatography (EtOAc/hexanes, 1:4 v/v) afforded **3b** (0.1820 g, 60%); white solid; <sup>1</sup>H NMR (CDCl<sub>3</sub>, 500 MHz): δ 8.22 (d, *J* = 8.7 Hz, 2H), 7.83 (d, *J* = 8.3 Hz, 2H), 7.68 (d, *J* = 15.5 Hz, 1H), 7.63 (d, *J* = 8.7 Hz, 2H), 7.36 (d, *J* = 8.1 Hz, 2H), 7.01 (d, *J* = 15.5 Hz, 1H), 2.44 (1H, s); <sup>13</sup>C{<sup>1</sup>H} NMR (CDCl<sub>3</sub>, 125 MHz): δ 149.0, 145.2, 138.8, 138.7, 136.9, 132.2, 130.3, 129.3, 128.1, 124.4, 21.7 ppm.



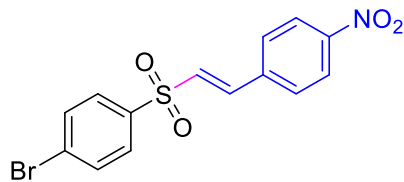

**(E)-1-bromo-4-((4-nitrostyryl)sulfonyl)benzene (3c)<sup>2</sup>**

Purification by column chromatography (EtOAc/hexanes, 1:4 v/v) afforded **3c** (0.1510 g, 41%); white solid; <sup>1</sup>H NMR (CDCl<sub>3</sub>, 500 MHz): 8.26 (d, *J* = 8.7 Hz, 2H), 7.82 (d, *J* = 8.6 Hz, 2H), 7.73–7.71 (m, 3H), 7.65 (d, *J* = 8.7 Hz, 2H), 6.98 (d, *J* = 15.5 Hz, 1H); <sup>13</sup>C{<sup>1</sup>H} NMR (CDCl<sub>3</sub>, 125 MHz): δ 149.3, 139.9, 139.0, 138.3, 133.1, 131.5, 129.6, 129.5, 129.4, 124.5 ppm.

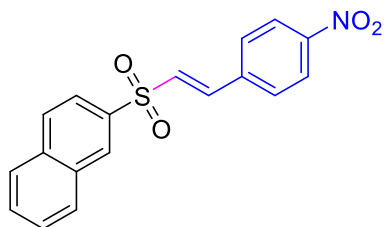

**(E)-2-((4-nitrostyryl)sulfonyl)naphthalene (3d)**

Purification by column chromatography (EtOAc/hexanes, 3:7 v/v) afforded **3d** (0.3360 g, 99%); pale yellow solid; <sup>1</sup>H NMR (CDCl<sub>3</sub>, 500 MHz): δ 8.57 (s, 1H), 8.24 (d, *J* = 8.8 Hz, 2H), 8.02 (d, *J* = 8.4 Hz, 2H), 7.93 (d, *J* = 8.1 Hz, 1H), 7.89 (dd, *J* = 8.6, 1.7 Hz, 1H), 7.77 (d, *J* = 15.5 Hz, 1H), 7.70–7.67 (m, 1H), 7.66–7.64 (m, 3H), 7.07 (d, *J* = 15.5 Hz, 1H); <sup>13</sup>C{<sup>1</sup>H} NMR (CDCl<sub>3</sub>, 125 MHz): δ 149.2, 139.4, 138.6, 136.7, 135.6, 132.50, 132.0, 130.1, 130.0, 129.7, 129.6, 129.4, 128.2, 128.0, 124.4, 122.6 ppm.

#### Characterization data of vinyl sulfones-NH<sub>2</sub> (4)

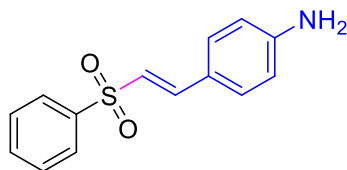

#### (*E*)-4-(2-(phenylsulfonyl)vinyl)aniline (**4a**)

Purification by column chromatography (EtOAc/hexanes, 1:1 v/v) afforded **4a** (25.9 mg, 50%); yellow solid; <sup>1</sup>H NMR (DMSO-*d*<sub>6</sub>, 500 MHz): δ 7.87 (d, *J* = 7.3 Hz, 2H), 7.67 (t, *J* = 7.3 Hz, 1H), 7.62 (t, *J* = 7.4 Hz, 2H), 7.41 (t, *J* = 12.0 Hz, 3H), 7.03 (d, *J* = 15.2 Hz, 1H), 6.54 (d, *J* = 8.5 Hz, 2H), 5.86 (s, 2H); <sup>13</sup>C{<sup>1</sup>H} NMR (DMSO-*d*<sub>6</sub>, 125 MHz): δ 152.2, 143.2, 142.0, 132.9, 131.0, 129.4, 126.6, 120.2, 119.3, 113.4 ppm; HRMS (ESI) *m/z* [M + Na]<sup>+</sup> calcd for C<sub>14</sub>H<sub>13</sub>NNaO<sub>2</sub>S 282.0559, found 282.0567.

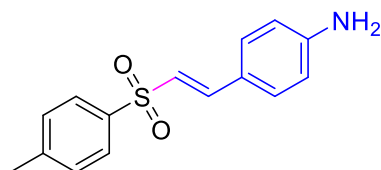

#### (*E*)-4-(2-tosylvinyl)aniline (**4b**)

Purification by column chromatography (DCM/MeOH, 99:1 v/v) afforded **4b** (26.2 mg, 48%); yellow solid; <sup>1</sup>H NMR (DMSO-*d*<sub>6</sub>, 500 MHz): 7.74 (d, *J* = 8.2 Hz, 2H), 7.42 (d, *J* = 8.1 Hz, 2H), 7.39–7.36 (m, 3H), 6.99 (d, *J* = 15.2 Hz, 1H), 6.54 (d, *J* = 8.5 Hz, 2H), 5.84 (s, 2H), 2.38 (s, 3H); <sup>13</sup>C{<sup>1</sup>H} NMR (DMSO-*d*<sub>6</sub>, 125 MHz): δ 152.1, 143.4, 142.6, 139.2, 130.9, 129.8, 126.7, 120.6, 119.34, 113.4, 21.0 ppm; HRMS (ESI) *m/z* [M + Na]<sup>+</sup> calcd for C<sub>15</sub>H<sub>15</sub>NNaO<sub>2</sub>S 297.0716, found 297.0720.

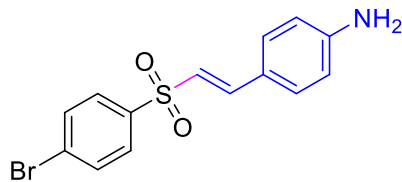

**(E)-4-(2-((4-bromophenyl)sulfonyl)vinyl)aniline (4c)**

Purification by column chromatography (EtOAc/hexanes, 1:1 v/v) afforded **4c** (37.2 mg, 55%); red-brown solid;  $^1\text{H}$  NMR (DMSO- $d_6$ , 500 MHz):  $\delta$  7.92–7.86 (m, 4H), 7.50 (d,  $J$  = 15.2 Hz, 1H), 7.47 (d,  $J$  = 8.6 Hz, 2H), 7.12 (d,  $J$  = 15.2 Hz, 1H), 6.62 (d,  $J$  = 8.6 Hz, 2H), 5.98 (s, 2H);  $^{13}\text{C}\{^1\text{H}\}$  NMR (DMSO- $d_6$ , 125 MHz):  $\delta$  152.3, 143.8, 141.4, 132.5, 131.1, 128.7, 126.9, 119.6, 119.2, 113.4 ppm; HRMS (ESI)  $m/z$   $[\text{M} + \text{Na}]^+$  calcd for  $\text{C}_{14}\text{H}_{12}\text{BrNNaO}_2\text{S}$  359.9664, found 359.9661.

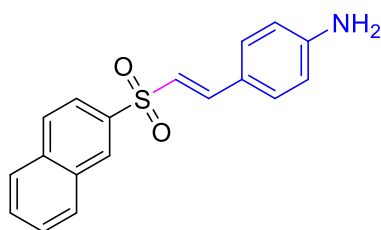

**(E)-4-(2-(naphthalen-2-ylsulfonyl)vinyl)aniline (4d)**

Purification by column chromatography (EtOAc/hexane, 3:7 v/v) afforded **4d** (61.3 mg, 99%); pale yellow solid;  $^1\text{H}$  NMR (DMSO- $d_6$ , 500 MHz):  $\delta$  8.54 (s, 1H), 8.19 (d,  $J$  = 8.0 Hz, 1H), 8.14 (d,  $J$  = 8.7 Hz, 1H), 8.04 (d,  $J$  = 8.0 Hz, 1H), 7.86 (dd,  $J$  = 8.7, 1.8 Hz, 1H), 7.73–7.66 (m, 2H), 7.48 (d,  $J$  = 15.2 Hz, 1H), 7.40 (d,  $J$  = 8.6 Hz, 1H), 7.09 (d,  $J$  = 15.2 Hz, 1H), 6.54 (d,  $J$  = 8.6 Hz, 2H), 5.87 (s, 3H);  $^{13}\text{C}\{^1\text{H}\}$  NMR (DMSO- $d_6$ , 125 MHz):  $\delta$  152.2, 143.3, 139.0, 134.4, 131.9, 131.0, 129.6, 129.3, 129.0, 127.8, 127.7, 127.5, 122.3, 120.2, 119.4, 113.4 ppm; HRMS (ESI)  $m/z$   $[\text{M} + \text{Na}]^+$  calcd for  $\text{C}_{18}\text{H}_{15}\text{NNaO}_2\text{S}$  332.0716, found 332.0735.

# $^1\text{H}$ and $^{13}\text{C}$ NMR spectra of vinyl sulfones- $\text{NO}_2$ (3)

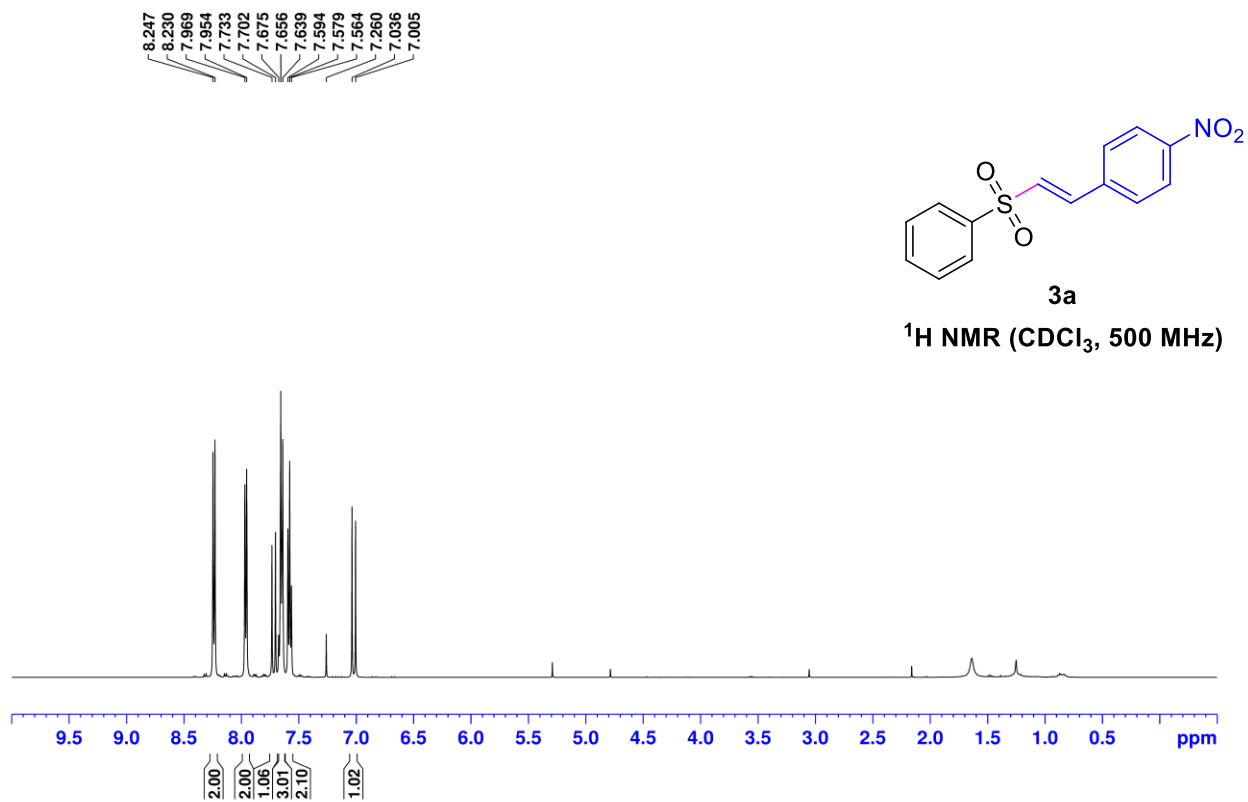

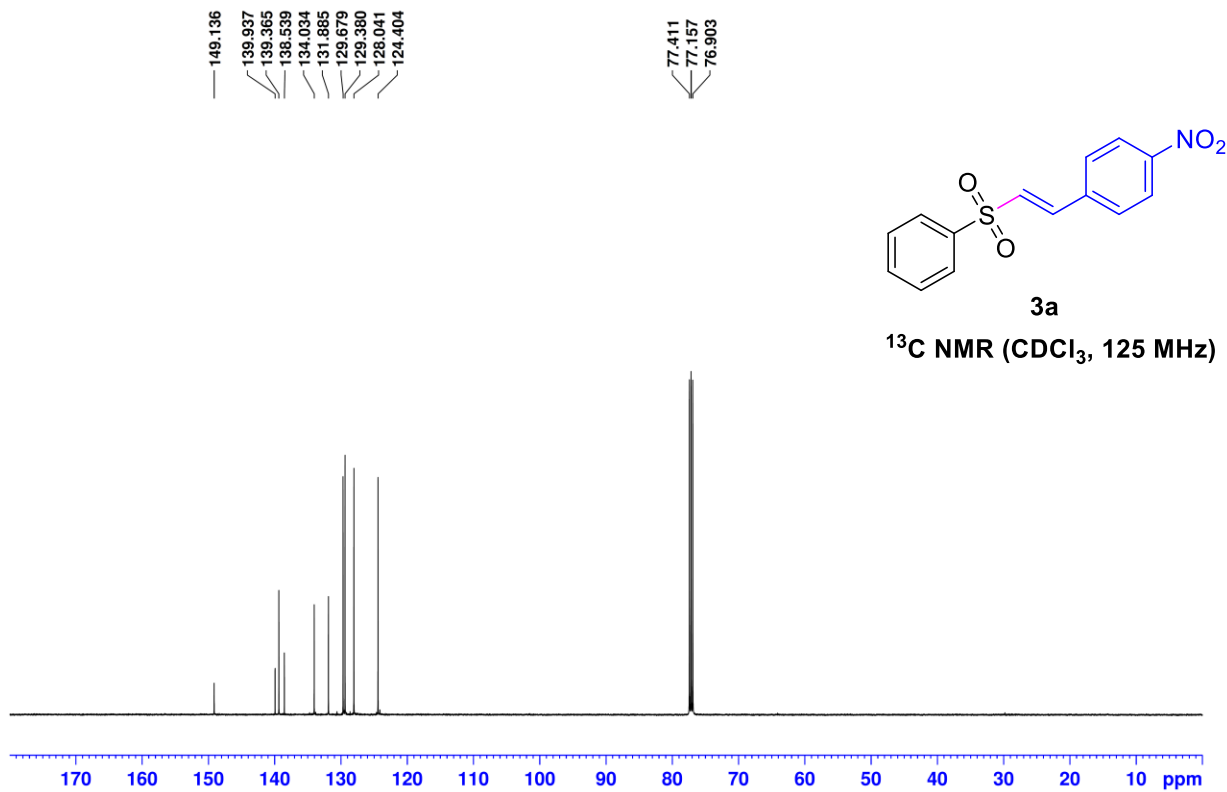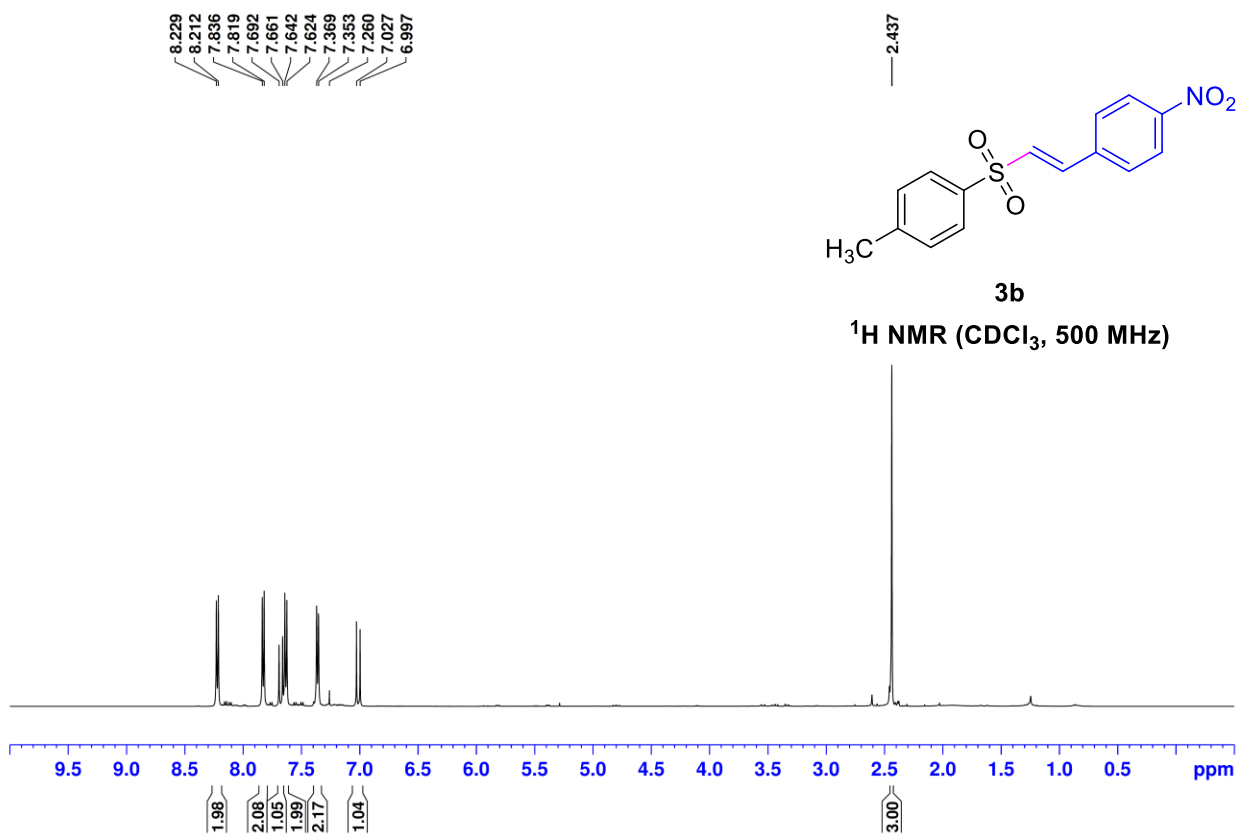

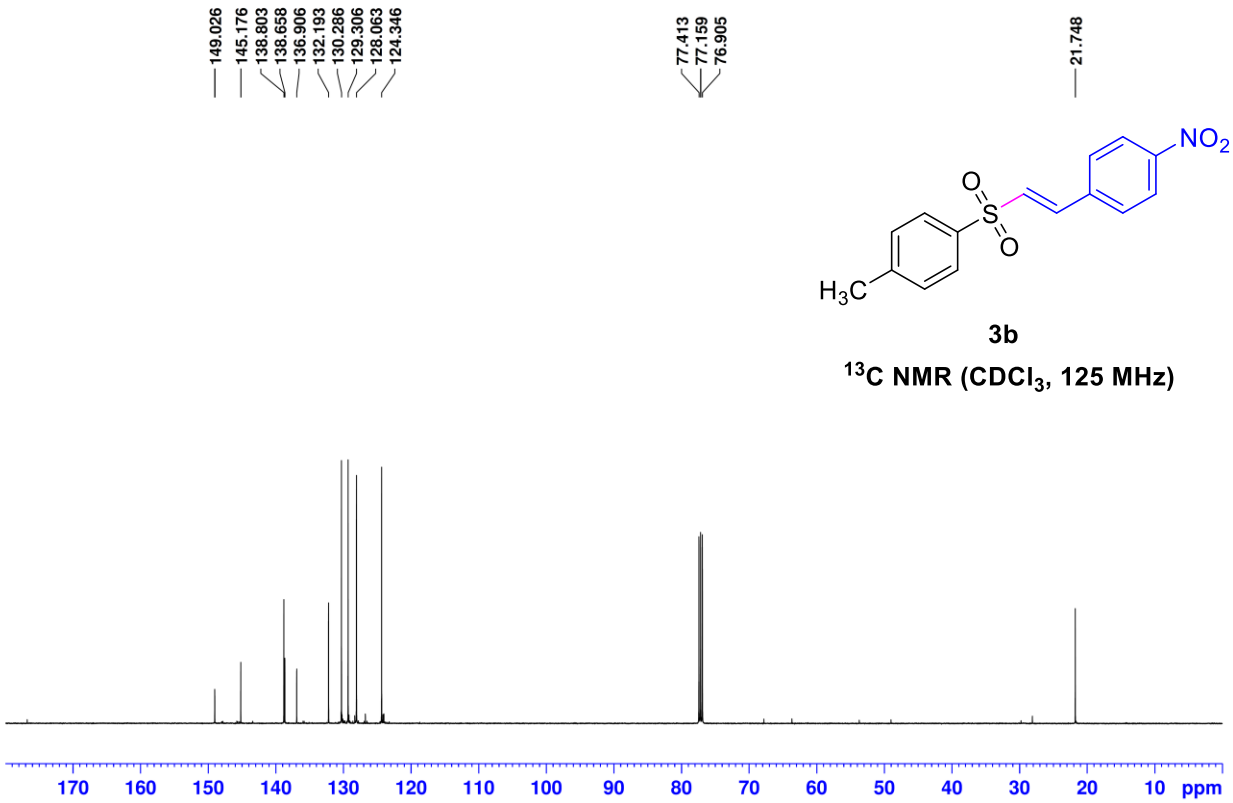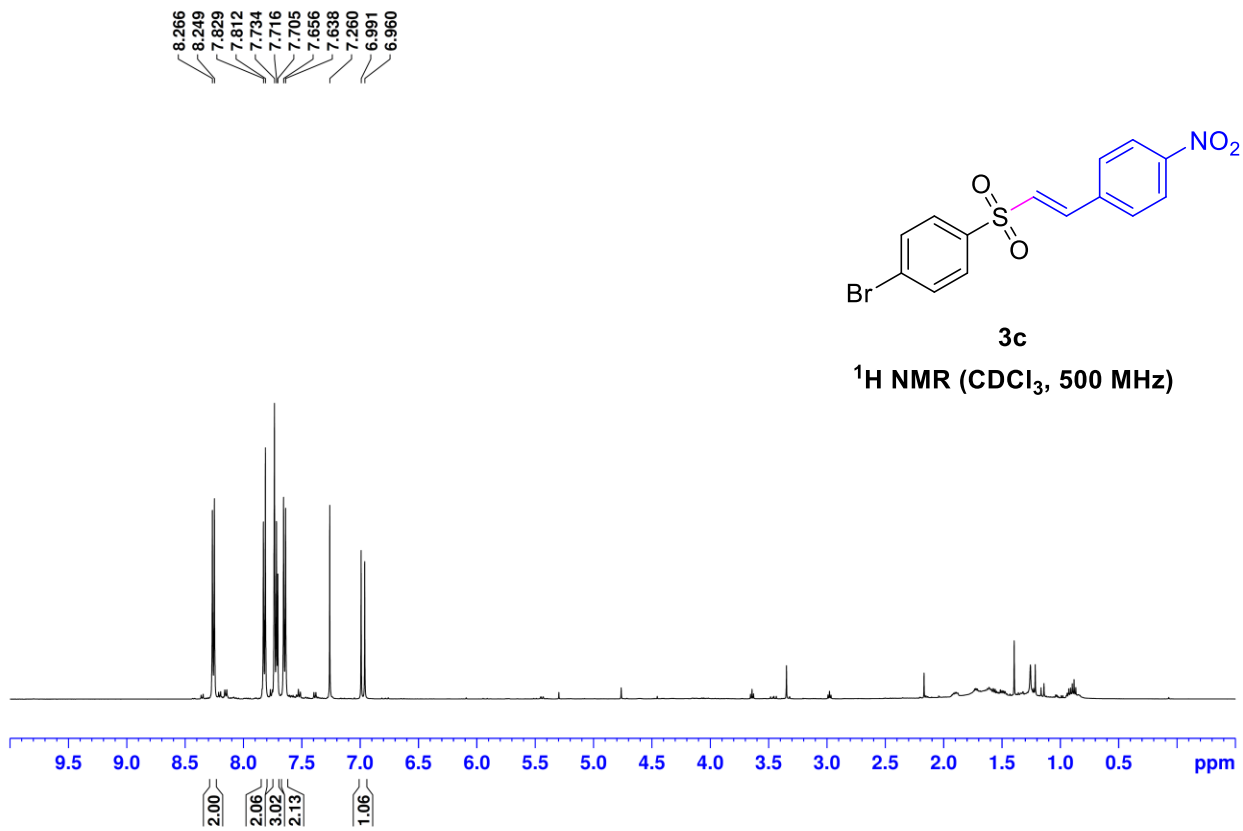

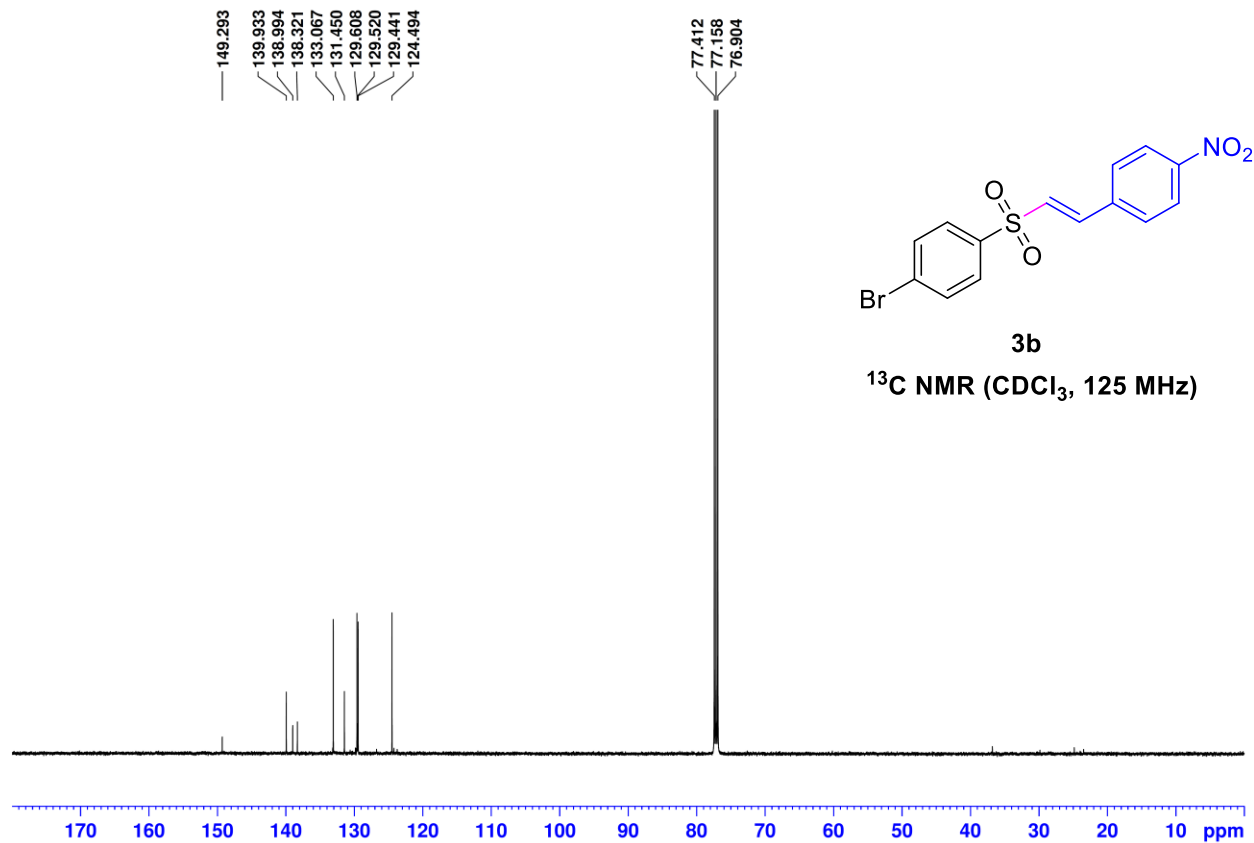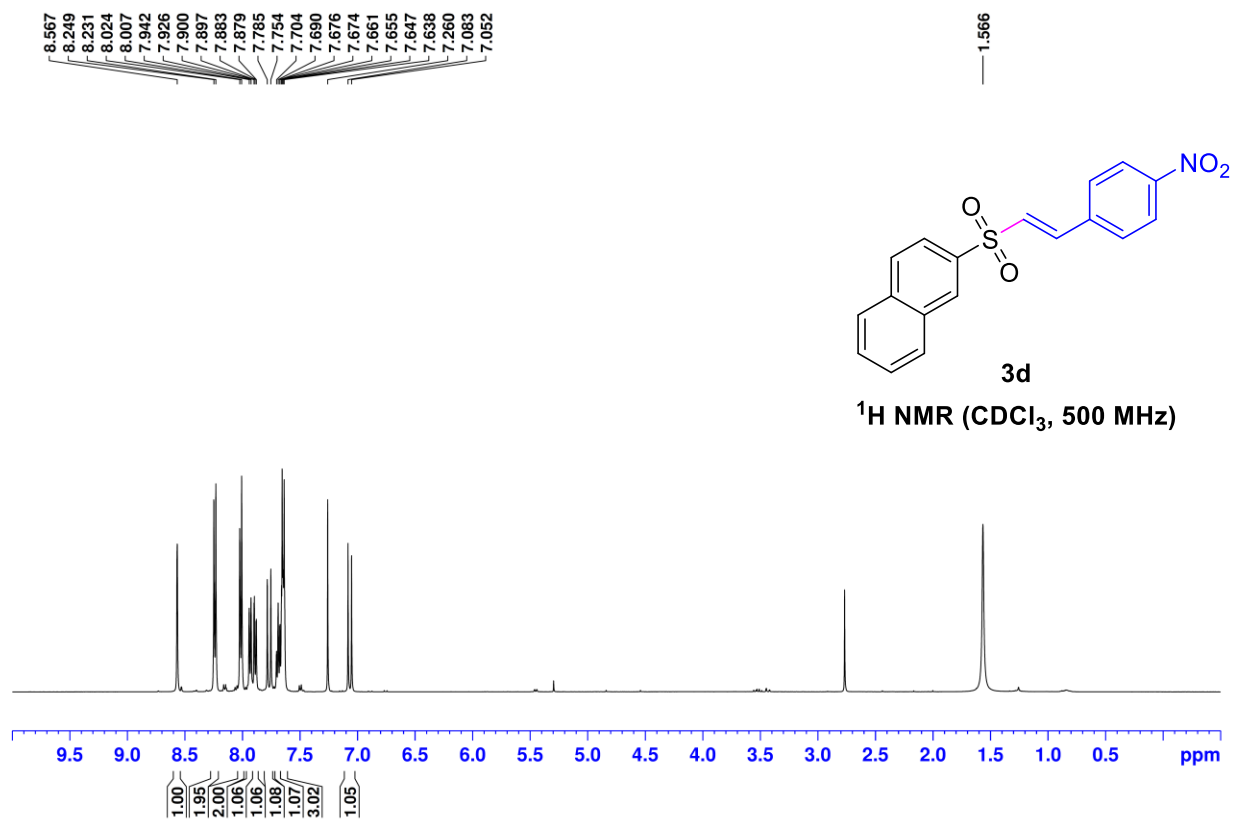

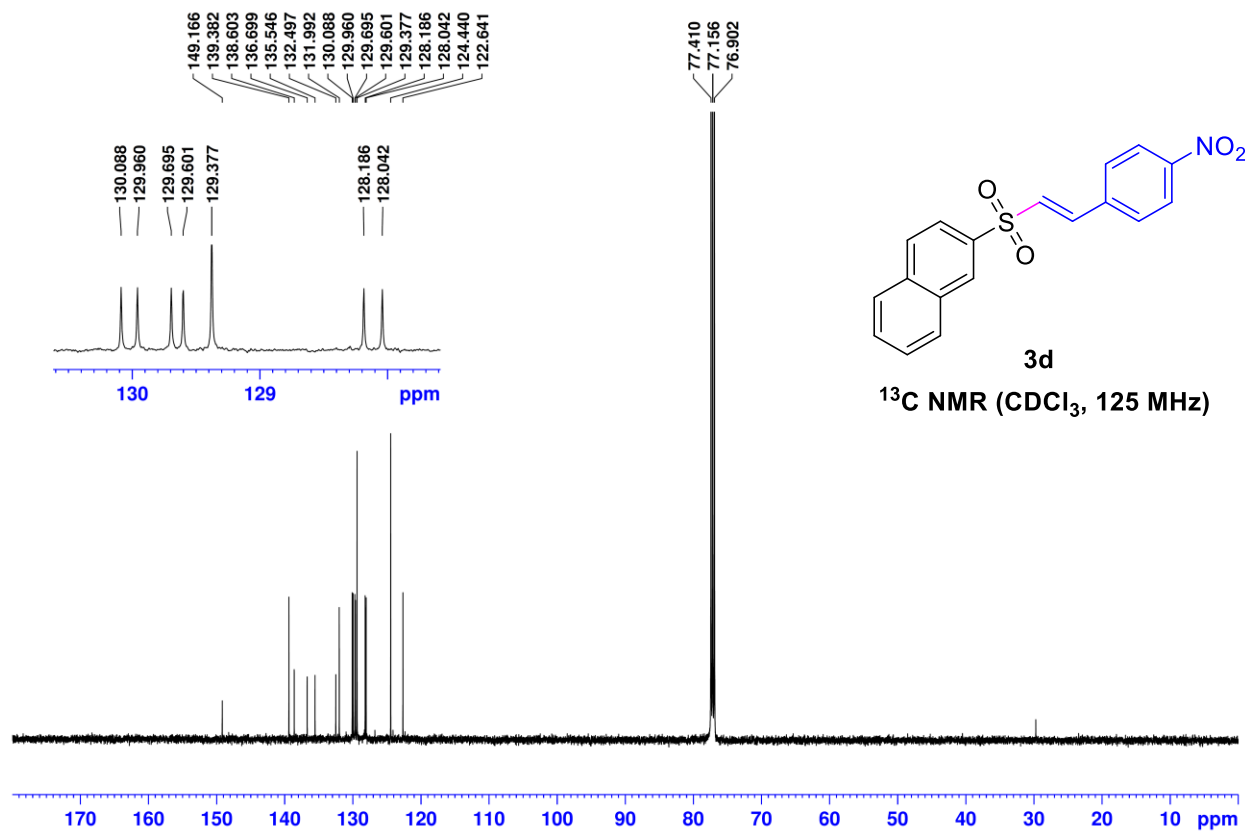

**<sup>1</sup>H and <sup>13</sup>C NMR spectra of vinyl sulfones-NH<sub>2</sub> (4)**

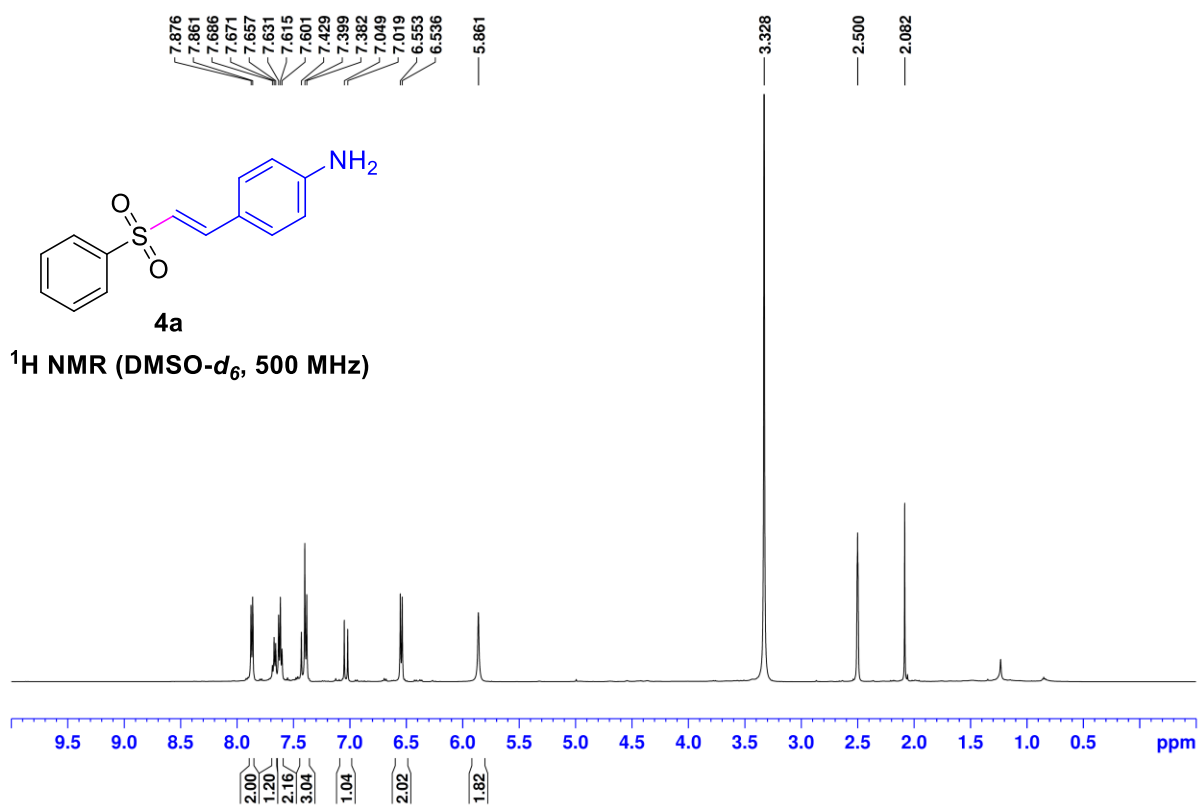



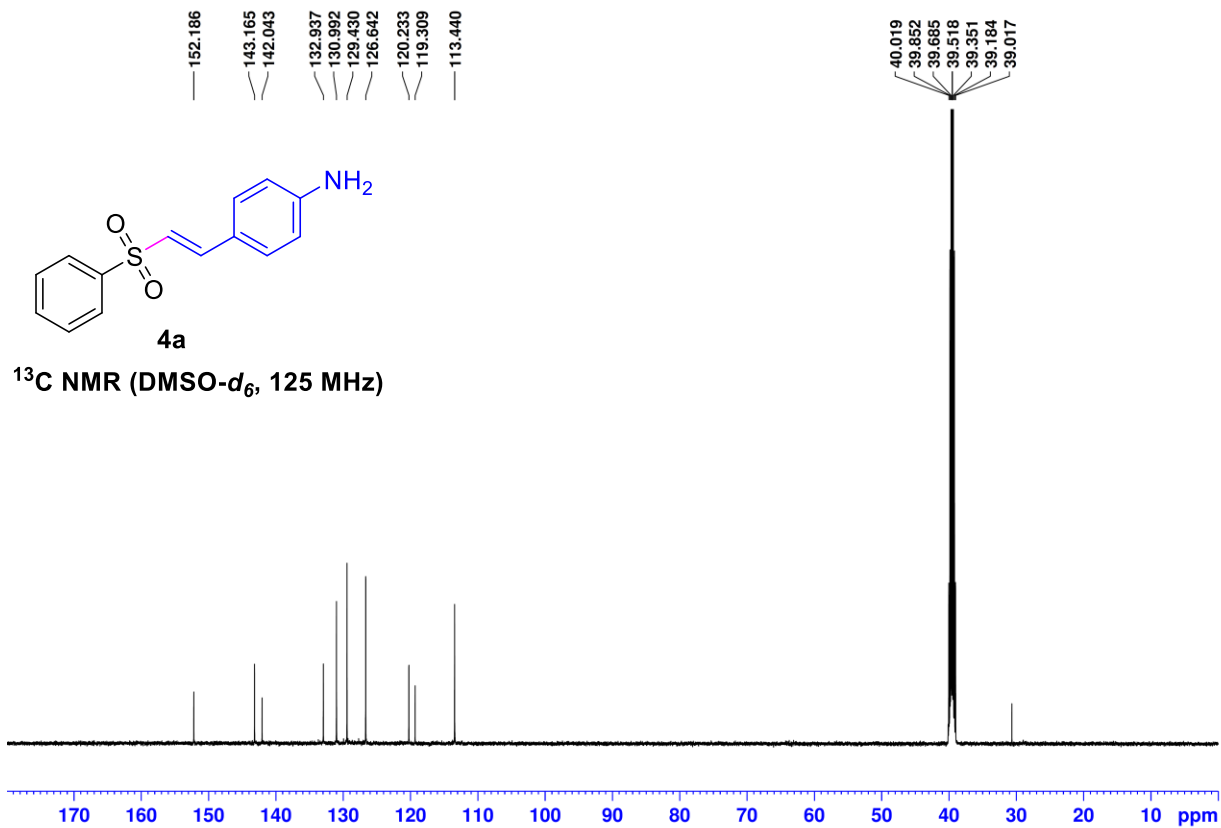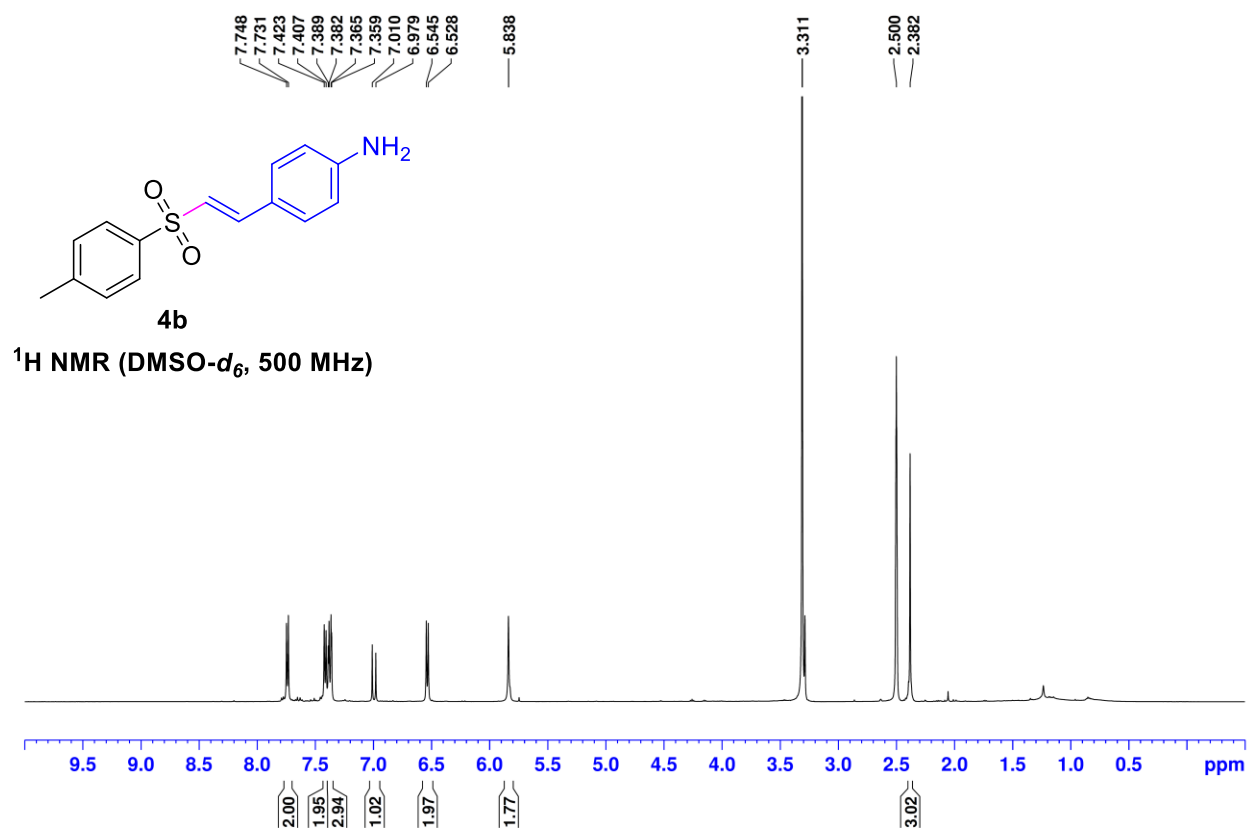

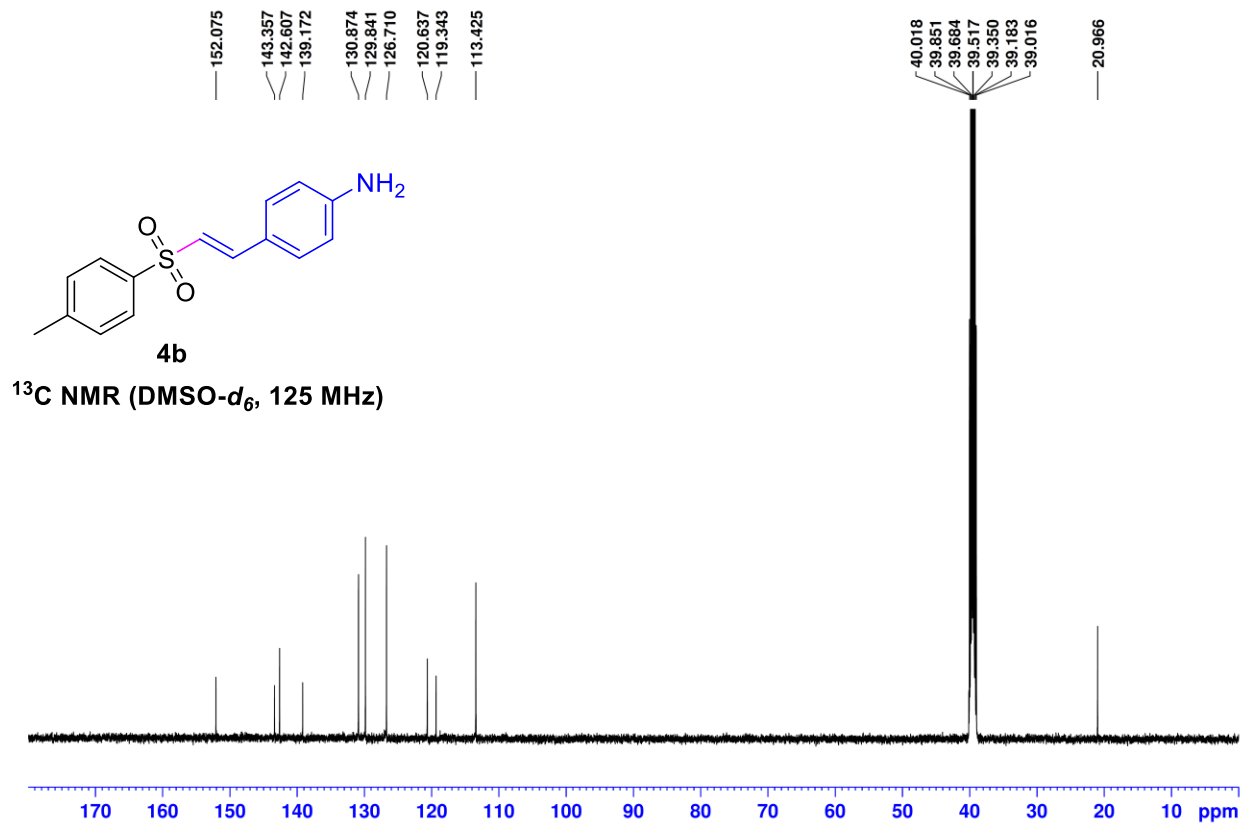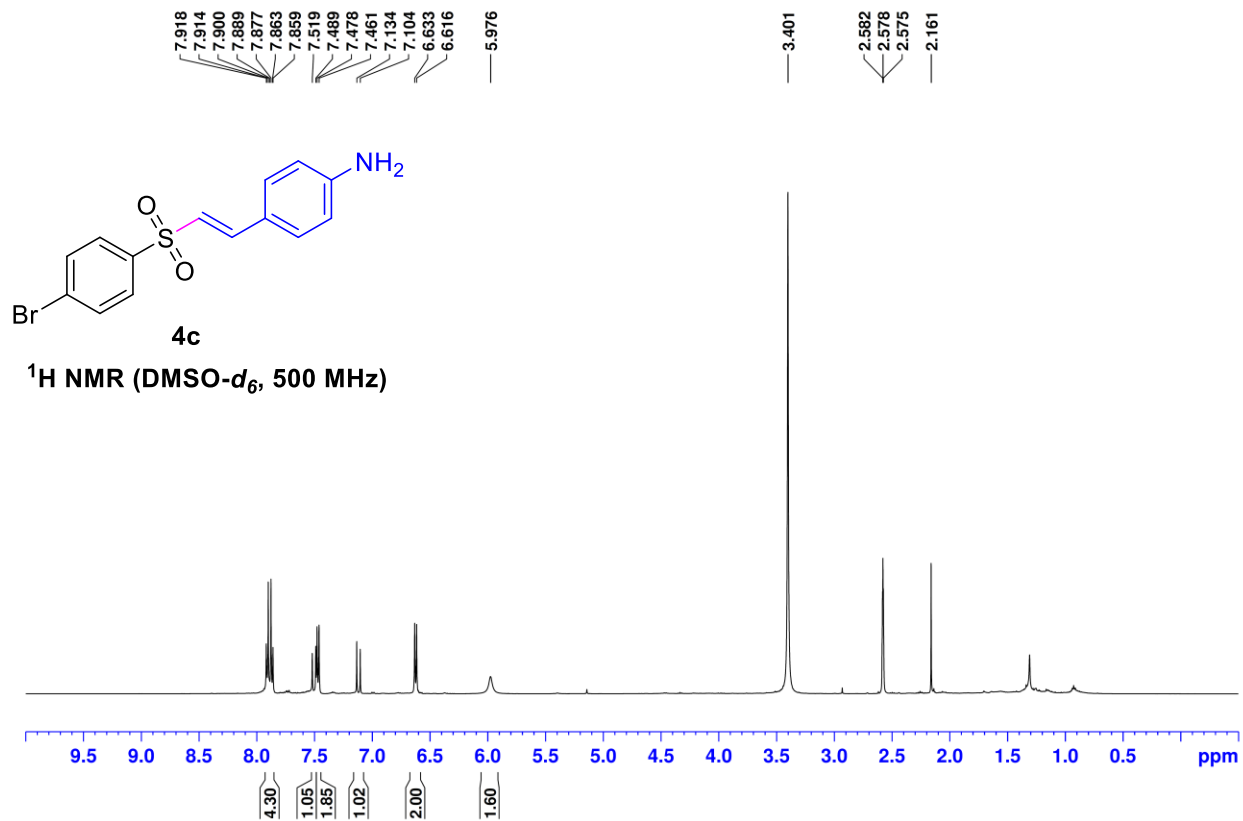

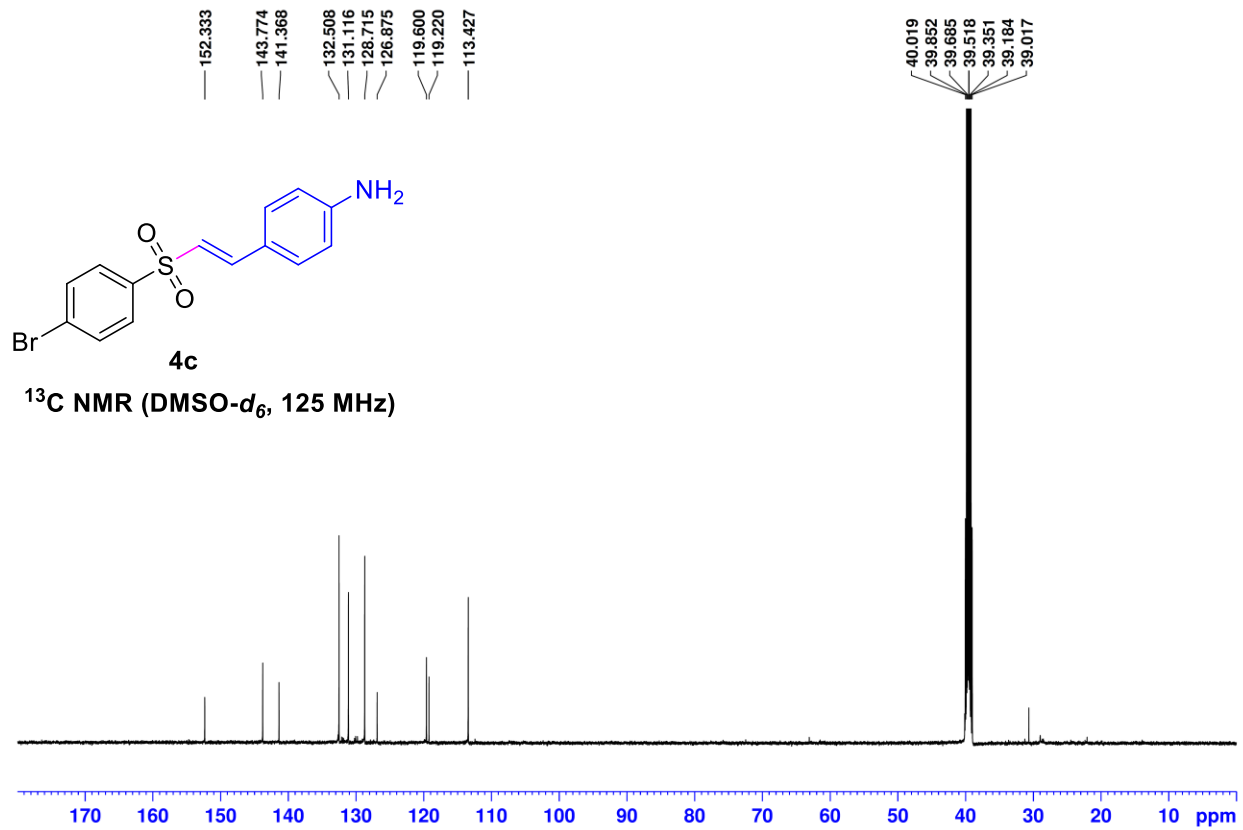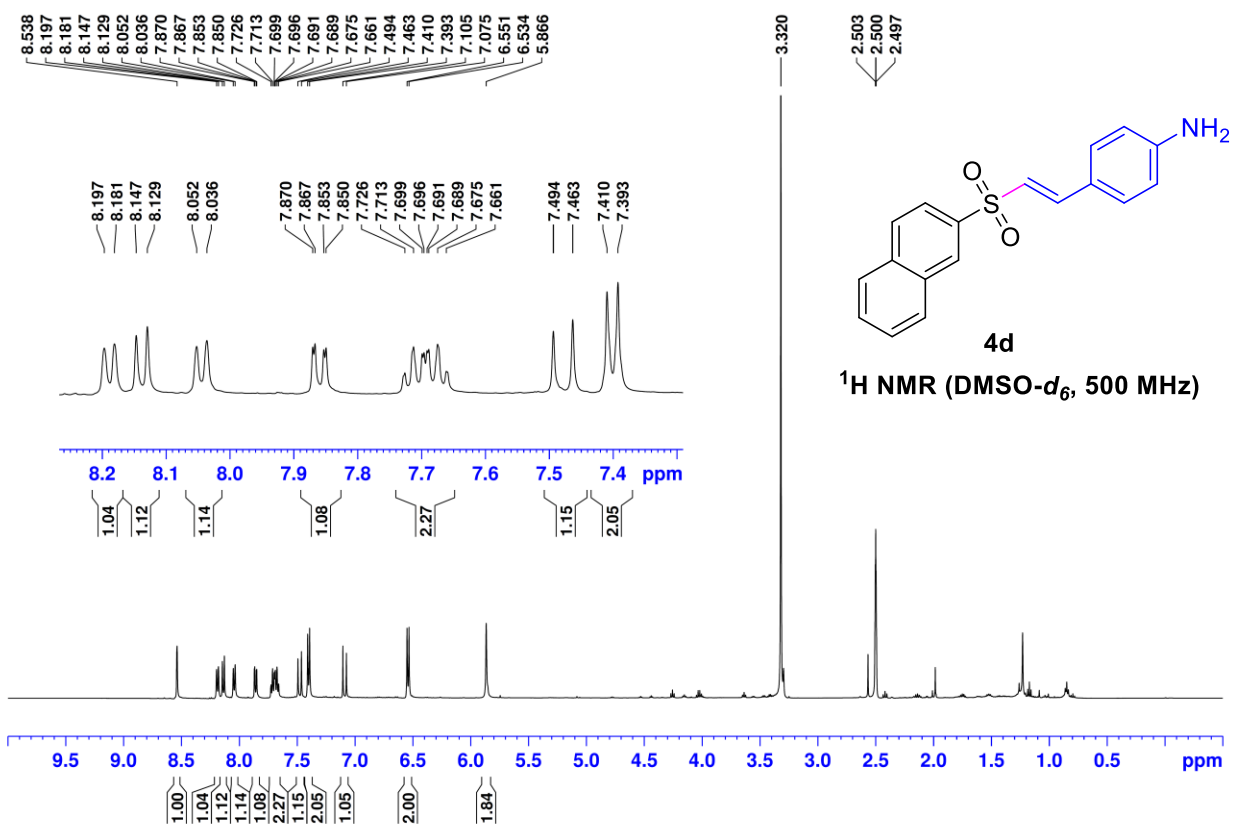

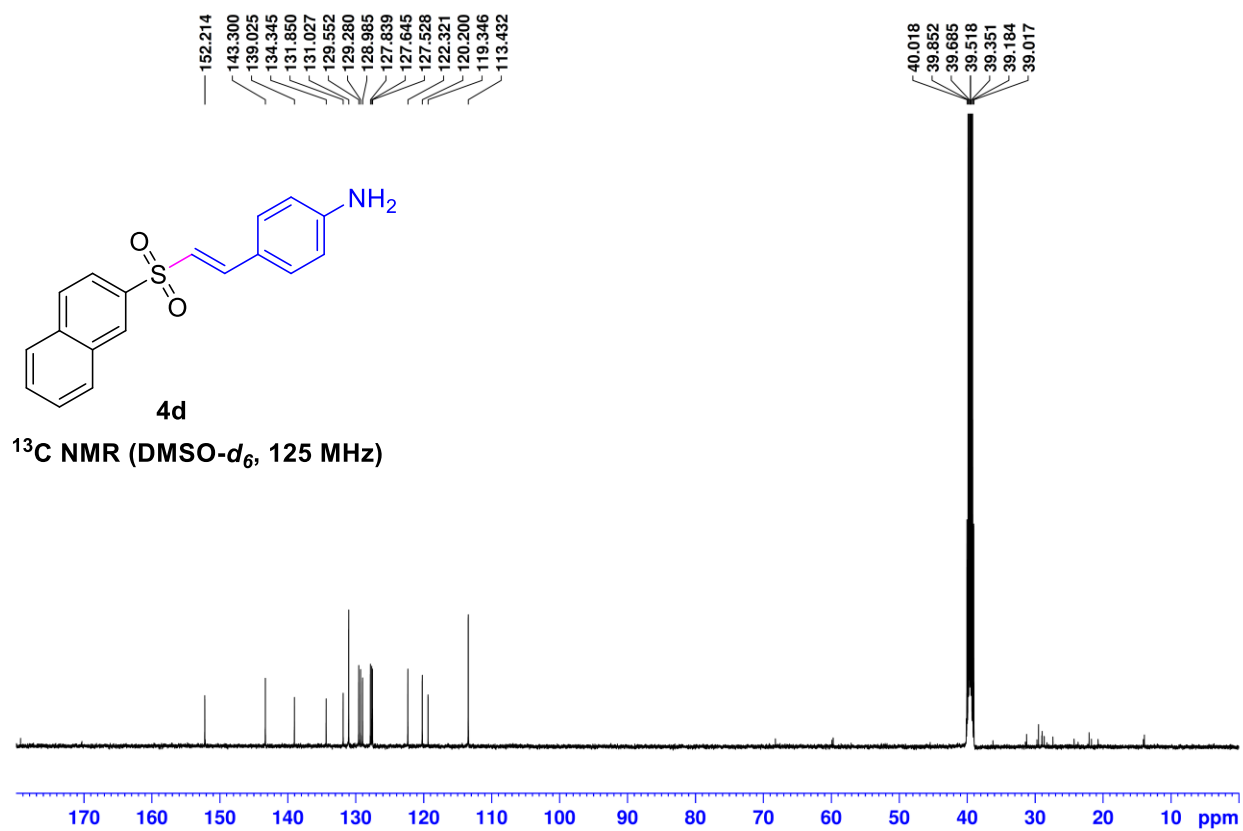

## HRMS spectra of vinyl sulfones-NH<sub>2</sub> (4)

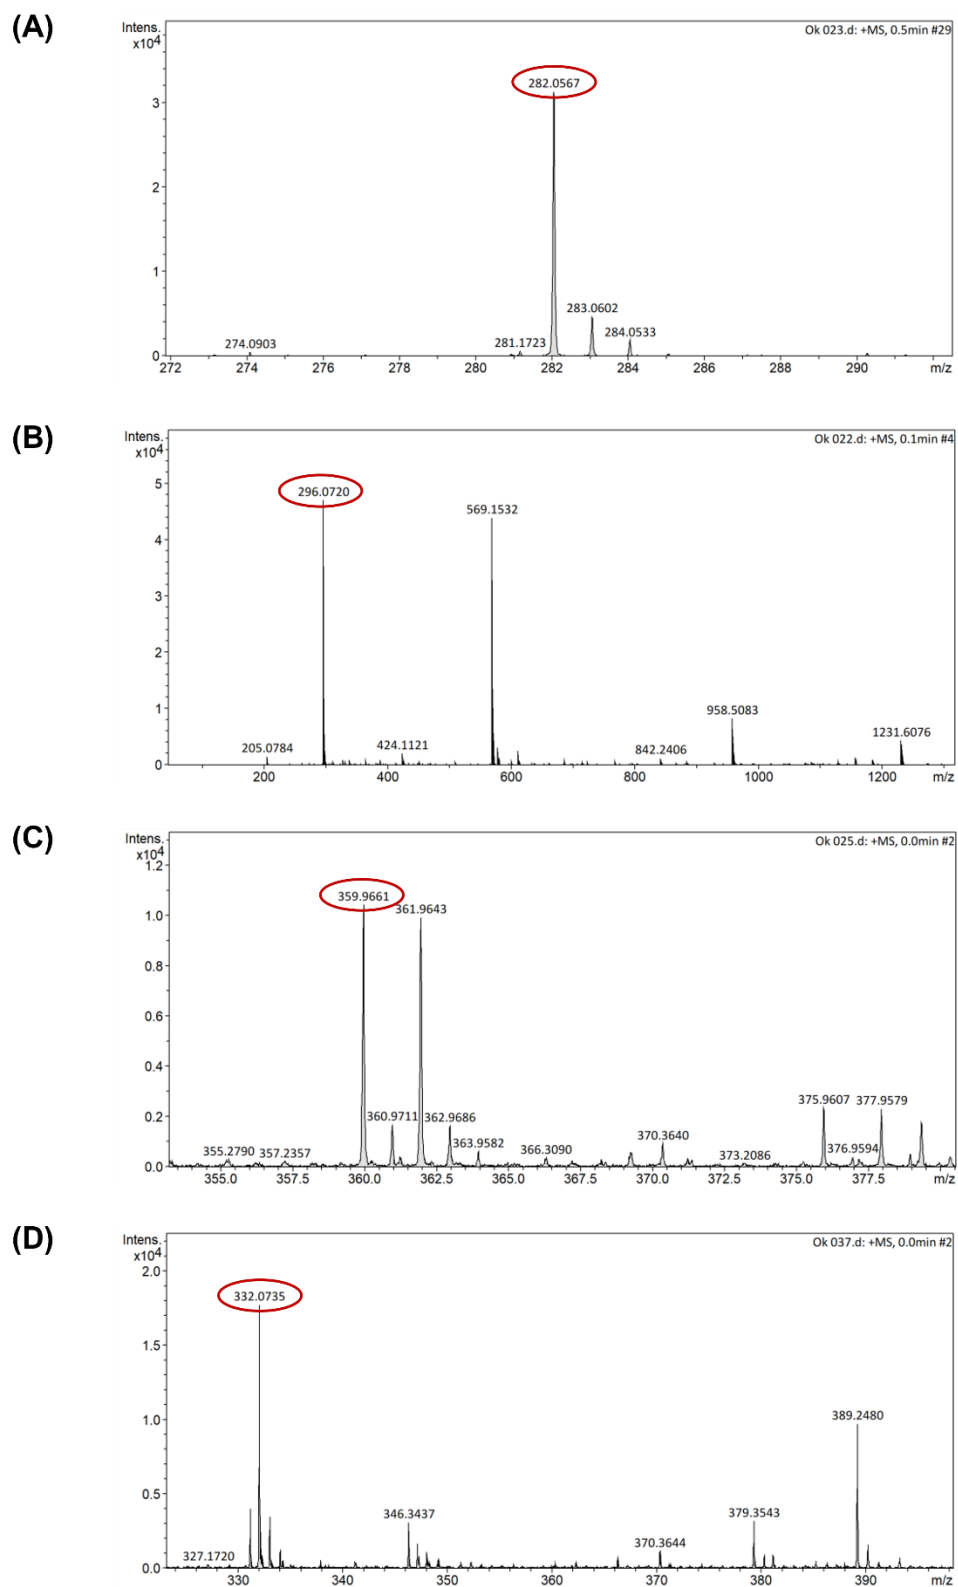

Fig. S1. HRMS spectra of (A) **4a**, (B) **4b**, (C) **4c**, and (D) **4d**.

## Absorption and emission spectroscopic analyses

**Table S1.** The photophysical properties of vinyl sulfones-NO<sub>2</sub> (**3a–3d**) (10 μM) in different solvents.

| Solvent    | dye       | <sup>a</sup> λ <sub>abs</sub> (nm) | <sup>b</sup> λ <sub>em</sub> (nm) | <sup>c</sup> Δν (nm) | <sup>d</sup> Φ <sub>f</sub> | <sup>e</sup> ε (M <sup>-1</sup> cm <sup>-1</sup> ) |
|------------|-----------|------------------------------------|-----------------------------------|----------------------|-----------------------------|----------------------------------------------------|
| Toluene    | <b>3a</b> | 298                                |                                   | Non-fluorescence     |                             | 2.38 × 10 <sup>4</sup>                             |
|            | <b>3b</b> | 285                                |                                   | Non-fluorescence     |                             | 8.88 × 10 <sup>4</sup>                             |
|            | <b>3c</b> | 285                                |                                   | Non-fluorescence     |                             | 1.05 × 10 <sup>5</sup>                             |
|            | <b>3d</b> | 285                                |                                   | Non-fluorescence     |                             | 9.15 × 10 <sup>4</sup>                             |
| Chloroform | <b>3a</b> | 297                                |                                   | Non-fluorescence     |                             | 2.72 × 10 <sup>4</sup>                             |
|            | <b>3b</b> | 276                                |                                   | Non-fluorescence     |                             | 1.28 × 10 <sup>5</sup>                             |
|            | <b>3c</b> | 277                                |                                   | Non-fluorescence     |                             | 1.28 × 10 <sup>5</sup>                             |
|            | <b>3d</b> | 278                                |                                   | Non-fluorescence     |                             | 1.27 × 10 <sup>5</sup>                             |
| DCM        | <b>3a</b> | 297                                |                                   | Non-fluorescence     |                             | 2.87 × 10 <sup>4</sup>                             |
|            | <b>3b</b> | 281                                |                                   | Non-fluorescence     |                             | 5.09 × 10 <sup>4</sup>                             |
|            | <b>3c</b> | 279                                |                                   | Non-fluorescence     |                             | 8.30 × 10 <sup>4</sup>                             |
|            | <b>3d</b> | 279                                |                                   | Non-fluorescence     |                             | 9.52 × 10 <sup>4</sup>                             |
| THF        | <b>3a</b> | 299                                |                                   | Non-fluorescence     |                             | 2.71 × 10 <sup>4</sup>                             |
|            | <b>3b</b> | 281                                |                                   | Non-fluorescence     |                             | 9.25 × 10 <sup>4</sup>                             |
|            | <b>3c</b> | 279                                |                                   | Non-fluorescence     |                             | 7.88 × 10 <sup>4</sup>                             |
|            | <b>3d</b> | 306                                |                                   | Non-fluorescence     |                             | 2.89 × 10 <sup>4</sup>                             |
| Acetone    | <b>3a</b> | 327                                |                                   | Non-fluorescence     |                             | 5.40 × 10 <sup>3</sup>                             |
|            | <b>3b</b> | 332                                |                                   | Non-fluorescence     |                             | 1.20 × 10 <sup>3</sup>                             |
|            | <b>3c</b> | 328                                |                                   | Non-fluorescence     |                             | 5.20 × 10 <sup>3</sup>                             |
|            | <b>3d</b> | 328                                |                                   | Non-fluorescence     |                             | 1.15 × 10 <sup>4</sup>                             |
| MeCN       | <b>3a</b> | 297                                |                                   | Non-fluorescence     |                             | 2.90 × 10 <sup>4</sup>                             |
|            | <b>3b</b> | 279                                |                                   | Non-fluorescence     |                             | 6.11 × 10 <sup>4</sup>                             |
|            | <b>3c</b> | 277                                |                                   | Non-fluorescence     |                             | 8.70 × 10 <sup>4</sup>                             |
|            | <b>3d</b> | 279                                |                                   | Non-fluorescence     |                             | 6.98 × 10 <sup>4</sup>                             |
| MeOH       | <b>3a</b> | 275                                |                                   | Non-fluorescence     |                             | 8.11 × 10 <sup>4</sup>                             |
|            | <b>3b</b> | 297                                |                                   | Non-fluorescence     |                             | 2.12 × 10 <sup>4</sup>                             |
|            | <b>3c</b> | 274                                |                                   | Non-fluorescence     |                             | 8.70 × 10 <sup>4</sup>                             |
|            | <b>3d</b> | 275                                |                                   | Non-fluorescence     |                             | 7.20 × 10 <sup>4</sup>                             |
| DMF        | <b>3a</b> | 301                                |                                   | Non-fluorescence     |                             | 2.62 × 10 <sup>4</sup>                             |
|            | <b>3b</b> | 279                                |                                   | Non-fluorescence     |                             | 7.91 × 10 <sup>4</sup>                             |
|            | <b>3c</b> | 280                                |                                   | Non-fluorescence     |                             | 5.15 × 10 <sup>4</sup>                             |
|            | <b>3d</b> | 280                                |                                   | Non-fluorescence     |                             | 5.78 × 10 <sup>4</sup>                             |
| DMSO       | <b>3a</b> | 318                                |                                   | Non-fluorescence     |                             | 1.76 × 10 <sup>4</sup>                             |
|            | <b>3b</b> | 318                                |                                   | Non-fluorescence     |                             | 1.76 × 10 <sup>4</sup>                             |
|            | <b>3c</b> | 319                                |                                   | Non-fluorescence     |                             | 1.70 × 10 <sup>4</sup>                             |
|            | <b>3d</b> | 319                                |                                   | Non-fluorescence     |                             | 2.03 × 10 <sup>4</sup>                             |
| DI water   | <b>3a</b> | 300                                |                                   | Non-fluorescence     |                             | 2.46 × 10 <sup>4</sup>                             |
|            | <b>3b</b> | 307                                |                                   | Non-fluorescence     |                             | 1.64 × 10 <sup>4</sup>                             |
|            | <b>3c</b> | 276                                |                                   | Non-fluorescence     |                             | 2.59 × 10 <sup>4</sup>                             |
|            | <b>3d</b> | 313                                |                                   | Non-fluorescence     |                             | 1.79 × 10 <sup>4</sup>                             |
| PBS        | <b>3a</b> | 299                                |                                   | Non-fluorescence     |                             | 2.20 × 10 <sup>4</sup>                             |
|            | <b>3b</b> | 306                                |                                   | Non-fluorescence     |                             | 1.66 × 10 <sup>4</sup>                             |
|            | <b>3c</b> | 265                                |                                   | Non-fluorescence     |                             | 9.30 × 10 <sup>4</sup>                             |
|            | <b>3d</b> | 258                                |                                   | Non-fluorescence     |                             | 3.28 × 10 <sup>4</sup>                             |

<sup>a</sup>λ<sub>abs</sub> = absorption maximum wavelength, <sup>b</sup>λ<sub>em</sub> = emission maximum wavelength (Excitation wavelength at λ<sub>abs</sub>), <sup>c</sup>Δν = Stokes shifts (λ<sub>em</sub> - λ<sub>abs</sub>), <sup>d</sup>Φ<sub>f</sub> = fluorescence quantum yields calculated by using quinine sulfate in 0.1 M H<sub>2</sub>SO<sub>4</sub> was used as a standard (Φ<sub>f</sub> = 0.54), <sup>e</sup>ε = molar absorptivity.

**Table S2.** The photophysical properties of vinyl sulfones-NH<sub>2</sub> **4a–4d** (10 μM) in different solvents.

| Solvent    | dye       | <sup>a</sup> λ <sub>abs</sub> (nm) | <sup>b</sup> λ <sub>em</sub> (nm) | <sup>c</sup> Δν (nm) | <sup>d</sup> Φ <sub>F</sub> | <sup>e</sup> ε (M <sup>-1</sup> cm <sup>-1</sup> ) |
|------------|-----------|------------------------------------|-----------------------------------|----------------------|-----------------------------|----------------------------------------------------|
| Toluene    | <b>4a</b> | 335                                | 403                               | 68                   | 0.0017                      | 2.50 × 10 <sup>4</sup>                             |
|            | <b>4b</b> | 332                                | 403                               | 71                   | 0.0012                      | 2.21 × 10 <sup>4</sup>                             |
|            | <b>4c</b> | 341                                | 409                               | 68                   | 0.0030                      | 2.23 × 10 <sup>4</sup>                             |
|            | <b>4d</b> | 340                                | 409                               | 69                   | 0.0035                      | 2.64 × 10 <sup>4</sup>                             |
| Chloroform | <b>4a</b> | 333                                | 407                               | 74                   | 0.0062                      | 2.38 × 10 <sup>4</sup>                             |
|            | <b>4b</b> | 330                                | 407                               | 77                   | 0.0012                      | 2.24 × 10 <sup>4</sup>                             |
|            | <b>4c</b> | 337                                | 414                               | 77                   | 0.0029                      | 2.24 × 10 <sup>4</sup>                             |
|            | <b>4d</b> | 338                                | 415                               | 77                   | 0.0037                      | 2.93 × 10 <sup>4</sup>                             |
| THF        | <b>4a</b> | 344                                | 420                               | 76                   | 0.0040                      | 2.85 × 10 <sup>4</sup>                             |
|            | <b>4b</b> | 344                                | 420                               | 76                   | 0.0033                      | 2.51 × 10 <sup>4</sup>                             |
|            | <b>4c</b> | 349                                | 430                               | 81                   | 0.0062                      | 2.33 × 10 <sup>4</sup>                             |
|            | <b>4d</b> | 350                                | 440                               | 90                   | 0.0146                      | 2.94 × 10 <sup>4</sup>                             |
| DCM        | <b>4a</b> | 334                                | 413                               | 79                   | 0.0022                      | 3.10 × 10 <sup>4</sup>                             |
|            | <b>4b</b> | 334                                | 413                               | 79                   | 0.0030                      | 2.86 × 10 <sup>4</sup>                             |
|            | <b>4c</b> | 338                                | 420                               | 82                   | 0.0036                      | 2.51 × 10 <sup>4</sup>                             |
|            | <b>4d</b> | 339                                | 424                               | 85                   | 0.0053                      | 3.00 × 10 <sup>4</sup>                             |
| DMSO       | <b>4a</b> | 357                                | 445                               | 88                   | 0.1066                      | 2.66 × 10 <sup>4</sup>                             |
|            | <b>4b</b> | 357                                | 445                               | 88                   | 0.1100                      | 2.32 × 10 <sup>4</sup>                             |
|            | <b>4c</b> | 361                                | 455                               | 94                   | 0.0623                      | 2.27 × 10 <sup>4</sup>                             |
|            | <b>4d</b> | 363                                | 490                               | 127                  | 0.0641                      | 3.02 × 10 <sup>4</sup>                             |
| DMF        | <b>4a</b> | 353                                | 437                               | 84                   | 0.0076                      | 2.88 × 10 <sup>4</sup>                             |
|            | <b>4b</b> | 353                                | 437                               | 84                   | 0.0069                      | 2.51 × 10 <sup>4</sup>                             |
|            | <b>4c</b> | 357                                | 441                               | 84                   | 0.0089                      | 2.37 × 10 <sup>4</sup>                             |
|            | <b>4d</b> | 358                                | 472                               | 114                  | 0.0139                      | 2.98 × 10 <sup>4</sup>                             |
| Acetone    | <b>4a</b> | 345                                | 426                               | 81                   | 0.0040                      | 2.76 × 10 <sup>4</sup>                             |
|            | <b>4b</b> | 345                                | 426                               | 81                   | 0.0061                      | 2.41 × 10 <sup>4</sup>                             |
|            | <b>4c</b> | 348                                | 437                               | 89                   | 0.0219                      | 2.21 × 10 <sup>4</sup>                             |
|            | <b>4d</b> | 349                                | 461                               | 112                  | 0.0501                      | 2.94 × 10 <sup>4</sup>                             |
| MeCN       | <b>4a</b> | 340                                | 431                               | 91                   | 0.0031                      | 2.75 × 10 <sup>4</sup>                             |
|            | <b>4b</b> | 340                                | 431                               | 91                   | 0.0030                      | 2.37 × 10 <sup>4</sup>                             |
|            | <b>4c</b> | 344                                | 442                               | 98                   | 0.0055                      | 2.32 × 10 <sup>4</sup>                             |
|            | <b>4d</b> | 343                                | 468                               | 125                  | 0.0137                      | 1.05 × 10 <sup>4</sup>                             |
| MeOH       | <b>4a</b> | 345                                | 436                               | 91                   | 0.0039                      | 2.35 × 10 <sup>4</sup>                             |
|            | <b>4b</b> | 345                                | 436                               | 91                   | 0.0032                      | 2.26 × 10 <sup>4</sup>                             |
|            | <b>4c</b> | 349                                | 448                               | 99                   | 0.0086                      | 2.39 × 10 <sup>4</sup>                             |
|            | <b>4d</b> | 349                                | 459                               | 110                  | 0.0074                      | 2.84 × 10 <sup>4</sup>                             |
| DI water   | <b>4a</b> | 331                                | 452                               | 121                  | 0.0012                      | 2.23 × 10 <sup>4</sup>                             |
|            | <b>4b</b> | 331                                | 452                               | 121                  | 0.0024                      | 1.96 × 10 <sup>4</sup>                             |
|            | <b>4c</b> | 336                                | 455                               | 119                  | 0.0009                      | 1.79 × 10 <sup>4</sup>                             |
|            | <b>4d</b> | 332                                | 454                               | 122                  | 0.0005                      | 1.10 × 10 <sup>4</sup>                             |
| PBS        | <b>4a</b> | 331                                | 452                               | 121                  | 0.0017                      | 2.23 × 10 <sup>4</sup>                             |
|            | <b>4b</b> | 328                                | 452                               | 124                  | 0.0021                      | 1.99 × 10 <sup>4</sup>                             |
|            | <b>4c</b> | 334                                | 452                               | 118                  | 0.0010                      | 1.78 × 10 <sup>4</sup>                             |
|            | <b>4d</b> | 334                                | 453                               | 119                  | 0.00012                     | 2.09 × 10 <sup>4</sup>                             |

<sup>a</sup>λ<sub>abs</sub> = absorption maximum wavelength, <sup>b</sup>λ<sub>em</sub> = emission maximum wavelength (Excitation wavelength at λ<sub>abs</sub>), <sup>c</sup>Δν = stokes shifts (λ<sub>em</sub> - λ<sub>abs</sub>), <sup>d</sup>Φ<sub>F</sub> = fluorescence quantum yields calculated by using quinine sulfate in 0.1 M H<sub>2</sub>SO<sub>4</sub> was used as a standard (Φ<sub>F</sub> = 0.54), <sup>e</sup>ε = molar absorptivity.

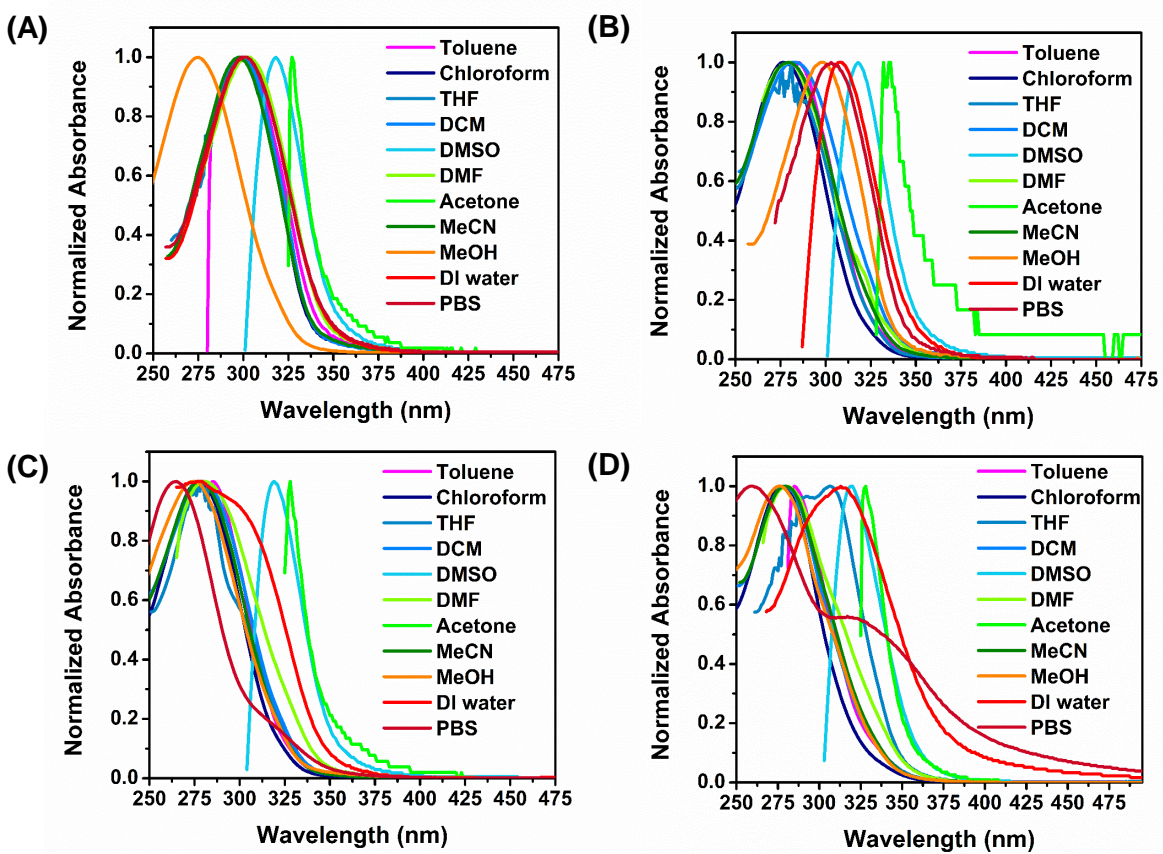

**Fig. S2.** Absorption spectra of (A) **3a**, (B) **3b**, (C) **3c**, and (D) **3d** (10  $\mu\text{M}$ ) in different solvents.



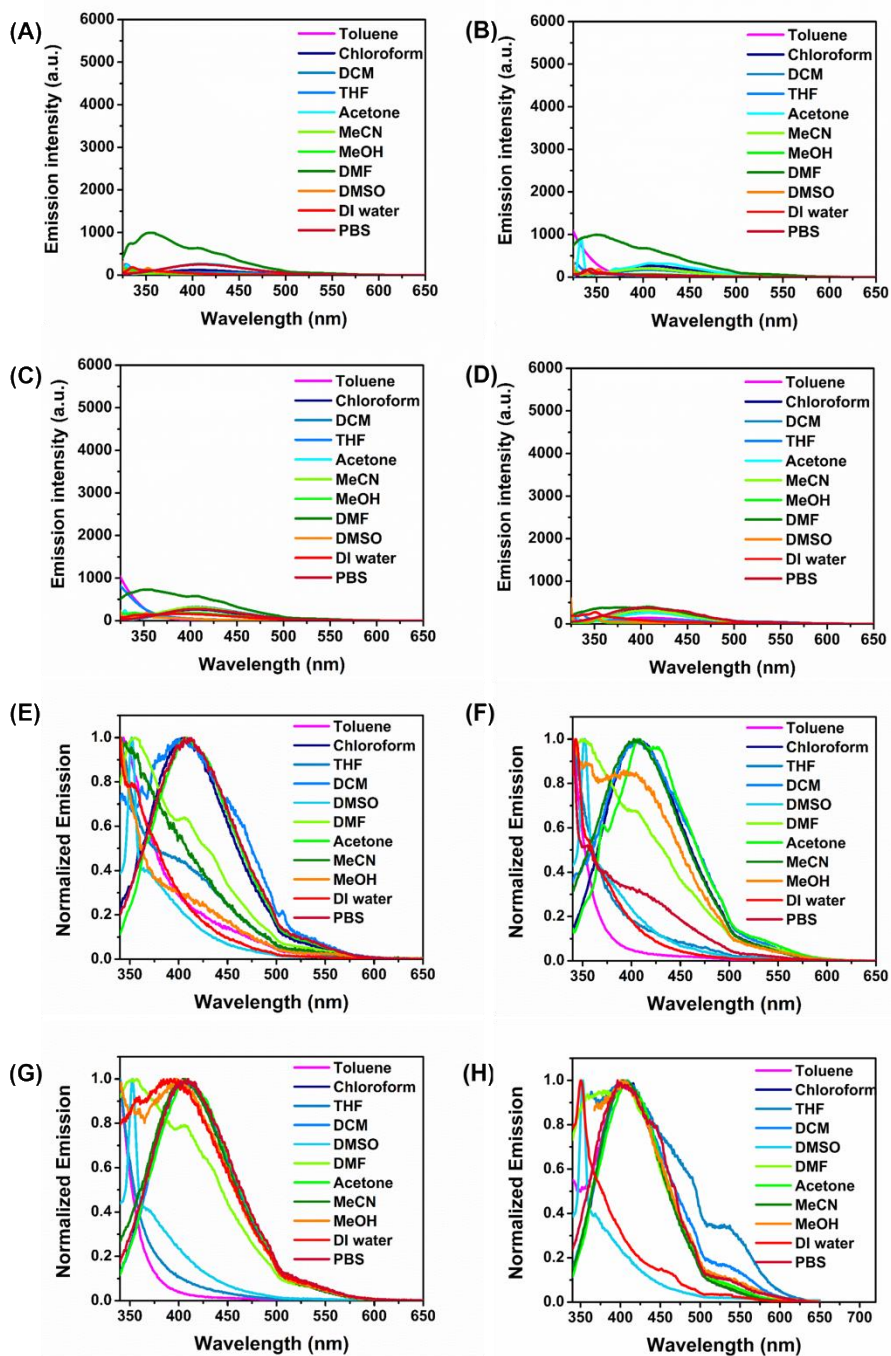

**Fig. S3.** Fluorescent spectra (excited at  $\lambda_{\text{max}}$  of each solvent) of (A) **3a**, (B) **3b**, (C) **3c**, and (D) **3d** (10  $\mu\text{M}$ ) in different solvents (y-axis is scaled to compare with Figure S5) and normalized fluorescent spectra (excited at  $\lambda_{\text{max}}$  of each solvent) of (E) **3a**, (F) **3b**, (G) **3c**, and (H) **3d** (10  $\mu\text{M}$ ) in different solvents.

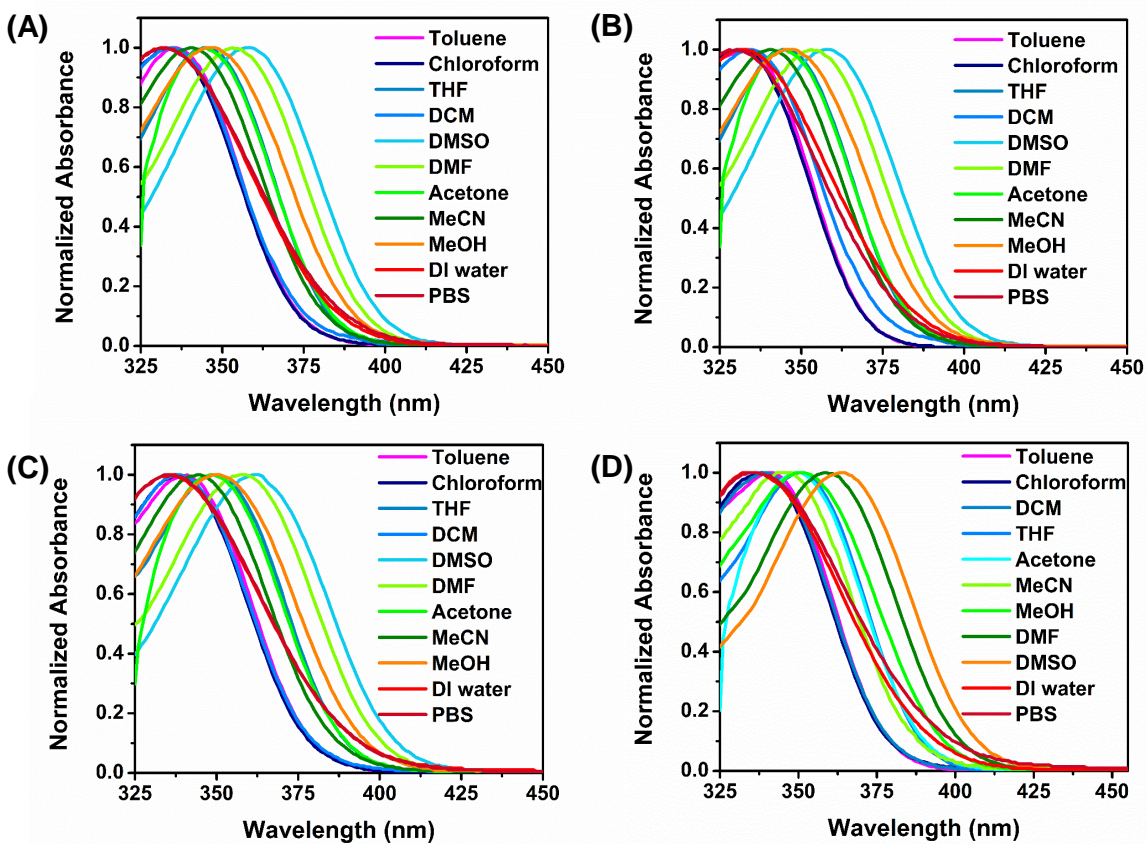

**Fig. S4.** Absorption spectra of (A) **4a**, (B) **4b**, (C) **4c**, and (D) **4d** (10  $\mu$ M) in different solvents.

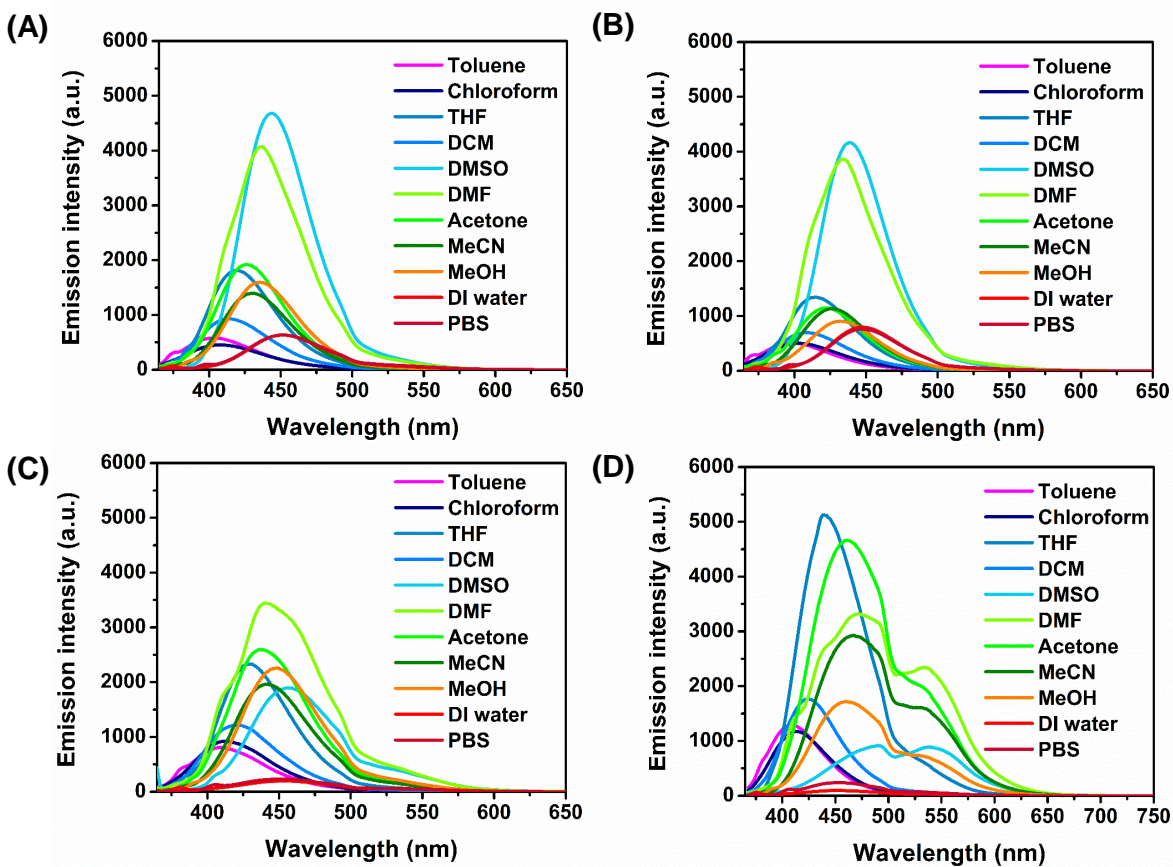

**Fig. S5.** Fluorescent spectra (excited at  $\lambda_{\text{max}}$  of each solvent) of (A) **4a**, (B) **4b**, (C) **4c**, and (D) **4d** (10  $\mu\text{M}$ ) in different solvents.

## Solvatochromism

**Table S3.** The photophysical properties of vinyl sulfones-NH<sub>2</sub> (**4a–4d**) (10 μM) in different solvents.

| Solvent    | $\epsilon^a$ | $n^b$ | $\Delta f^c$ | <b>4a</b>         |                  |               |            | <b>4b</b>         |                  |               |            | <b>4c</b>         |                  |               |            | <b>4d</b>         |                  |               |            |
|------------|--------------|-------|--------------|-------------------|------------------|---------------|------------|-------------------|------------------|---------------|------------|-------------------|------------------|---------------|------------|-------------------|------------------|---------------|------------|
|            |              |       |              | $\lambda_{abs}^d$ | $\lambda_{em}^e$ | $\Delta\nu^f$ | $\Phi_f^g$ |
| Toluene    | 2.37         | 1.496 | 0.0126       | 335               | 403              | 68            | 0.0017     | 332               | 403              | 71            | 0.0012     | 341               | 409              | 68            | 0.0030     | 340               | 409              | 69            | 0.0035     |
| Chloroform | 4.81         | 1.447 | 0.1482       | 333               | 407              | 74            | 0.0062     | 330               | 407              | 77            | 0.0012     | 337               | 414              | 77            | 0.0029     | 338               | 415              | 77            | 0.0037     |
| THF        | 7.58         | 1.404 | 0.2107       | 344               | 420              | 76            | 0.0040     | 344               | 420              | 76            | 0.0033     | 349               | 430              | 81            | 0.0062     | 350               | 440              | 90            | 0.0146     |
| DCM        | 10.37        | 1.424 | 0.2276       | 334               | 413              | 79            | 0.0022     | 334               | 413              | 79            | 0.0030     | 338               | 420              | 82            | 0.0036     | 339               | 424              | 85            | 0.0053     |
| DMSO       | 47.2         | 1.477 | 0.264        | 357               | 445              | 88            | 0.1066     | 357               | 445              | 88            | 0.1100     | 361               | 455              | 94            | 0.0623     | 363               | 490              | 127           | 0.0641     |
| DMF        | 36.7         | 1.431 | 0.2749       | 353               | 437              | 84            | 0.0076     | 353               | 437              | 84            | 0.0069     | 357               | 441              | 84            | 0.0089     | 358               | 472              | 114           | 0.0139     |
| Acetone    | 20.7         | 1.358 | 0.2846       | 345               | 426              | 81            | 0.0040     | 345               | 426              | 81            | 0.0061     | 348               | 437              | 89            | 0.0219     | 349               | 461              | 112           | 0.0501     |
| MeCN       | 37.5         | 1.344 | 0.3055       | 340               | 431              | 91            | 0.0031     | 340               | 431              | 91            | 0.0030     | 344               | 442              | 98            | 0.0055     | 343               | 468              | 125           | 0.0137     |
| MeOH       | 32.7         | 1.328 | 0.3086       | 345               | 436              | 91            | 0.0039     | 345               | 436              | 91            | 0.0032     | 349               | 448              | 99            | 0.0086     | 349               | 459              | 110           | 0.0074     |
| DI water   | 78.5         | 1.333 | 0.3193       | 331               | 452              | 121           | 0.0012     | 331               | 452              | 121           | 0.0024     | 336               | 455              | 119           | 0.0009     | 332               | 454              | 122           | 0.0005     |

<sup>a</sup> $\epsilon$  = solvent dielectric constant, <sup>b</sup> $n$  = index of refraction, <sup>c</sup> $\Delta f = (\epsilon - 1)/(2\epsilon + 1) - (n^2 - 1)/(2n^2 + 1)$  accounted for the spectral shifts due to reorientation of solvents molecules, called the orientation polarizability, <sup>d</sup> $\lambda_{abs}$  = absorption maximum wavelength (nm), <sup>e</sup> $\lambda_{em}$  = emission maximum wavelength (nm), <sup>f</sup> $\Delta\nu$  = stokes shifts ( $\lambda_{em} - \lambda_{abs}$ ) (nm), <sup>g</sup> $\Phi_f$  = fluorescence quantum yields calculated by using quinine sulfate in 0.1 M H<sub>2</sub>SO<sub>4</sub> was used as a standard ( $\Phi_f = 0.54$ ).

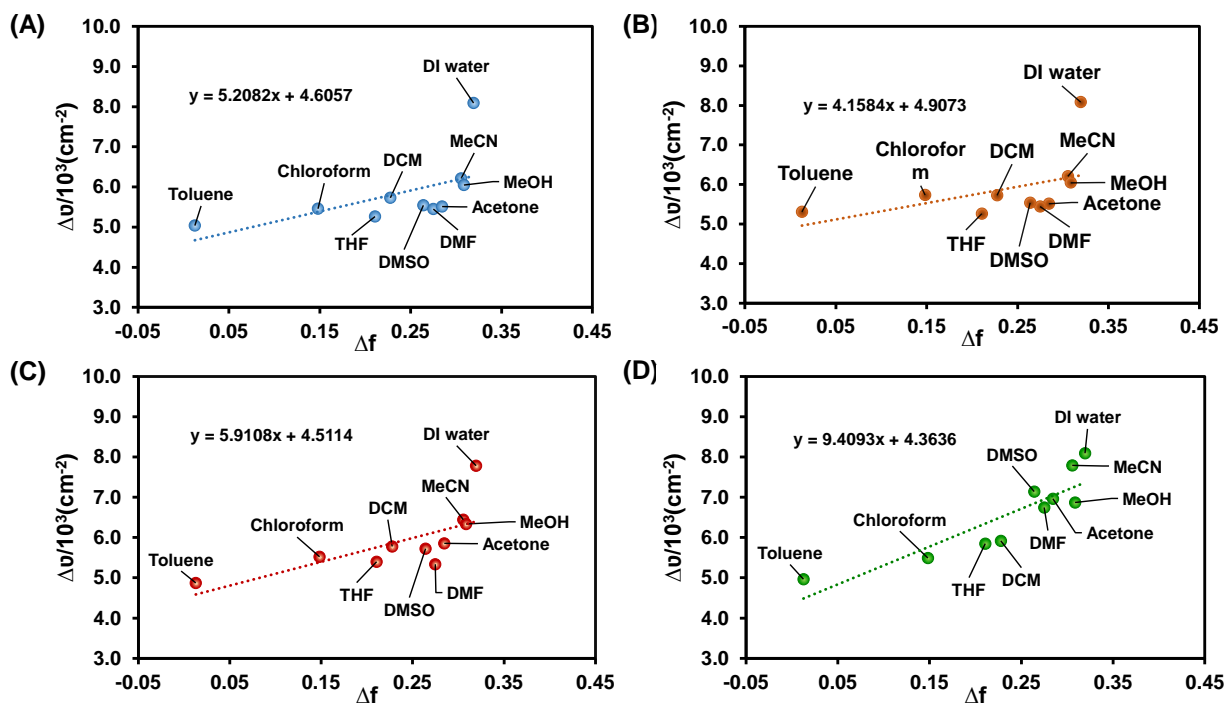

**Fig. S6.** Lippart-Mataga plots for (A) **4a**, (B) **4b**, (C) **4c**, and (D) **4d** (10 μM) in different solvents.

DFT calculation

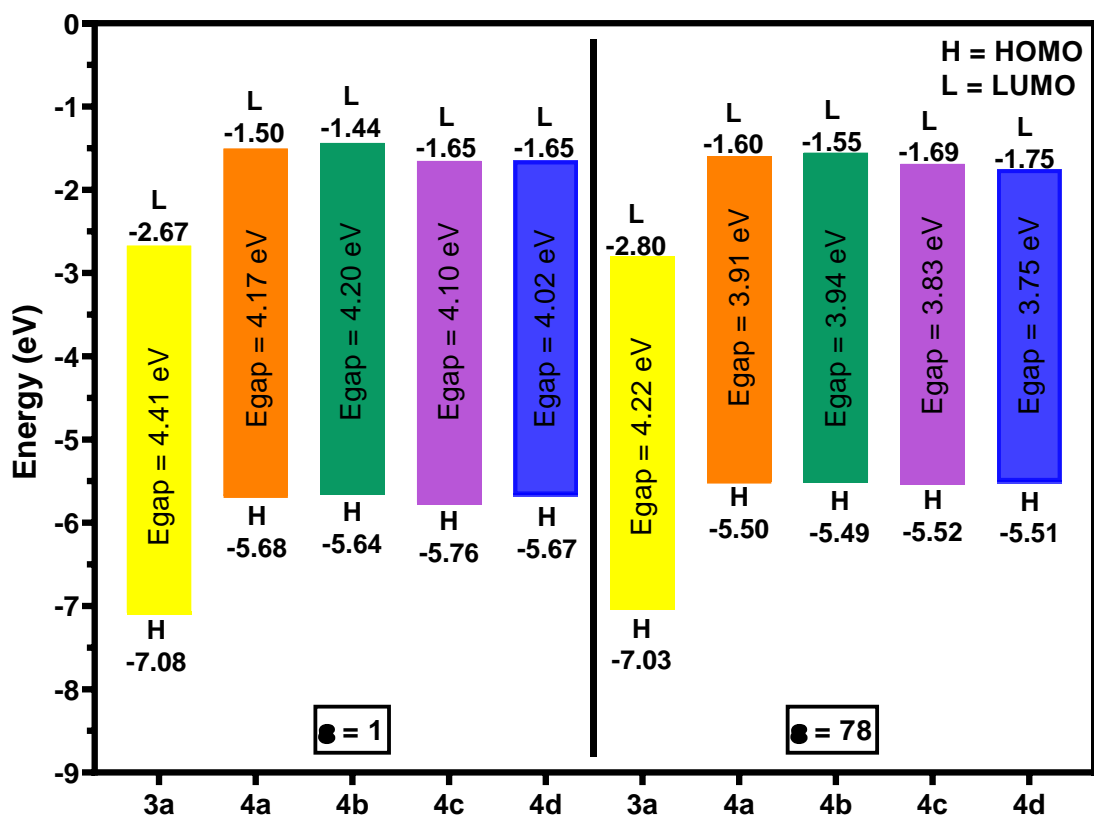

**Fig. S7.** HOMO-LUMO energy diagram in gas phase ( $\epsilon = 1$ ) and water phase ( $\epsilon = 78$ ) of **3a** and **4a–4d**.

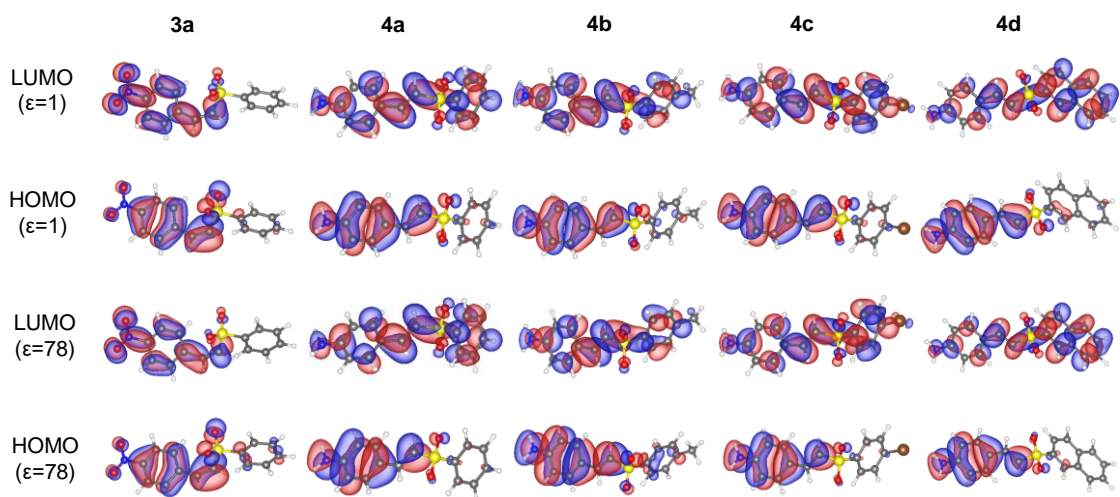

**Fig. S8.** Frontier molecular orbital (HOMO-LUMO) in gas phase ( $\epsilon = 1$ ) and water phase ( $\epsilon = 78$ ) of **3a** and **4a–4d**.

## Cytotoxicity assays

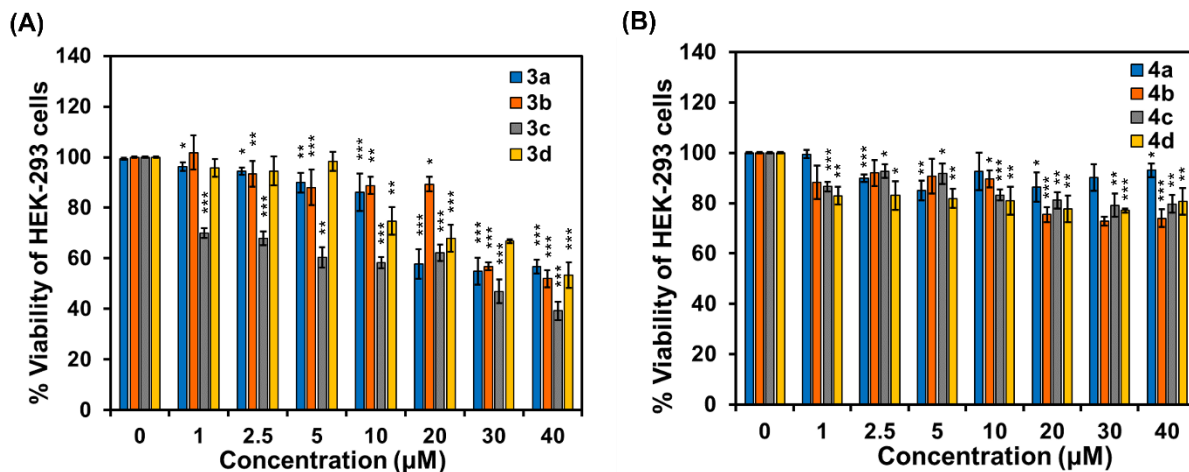

**Fig. S9.** Cytotoxicity assays of (A) vinyl sulfones-NO<sub>2</sub> (**3a–3d**) and (B) vinyl sulfones-NH<sub>2</sub> (**4a–4d**). HEK-293 cells were treated at different concentrations for 24 h (error bar represents standard deviation,  $n = 3$ ). Statistical analysis is based on T-test ( $*P < 0.05$ ,  $**P < 0.01$ ,  $***P < 0.001$ ), the control and each concentration were compared.

### Confocal images of HepG2 cells and corrected total cell fluorescence

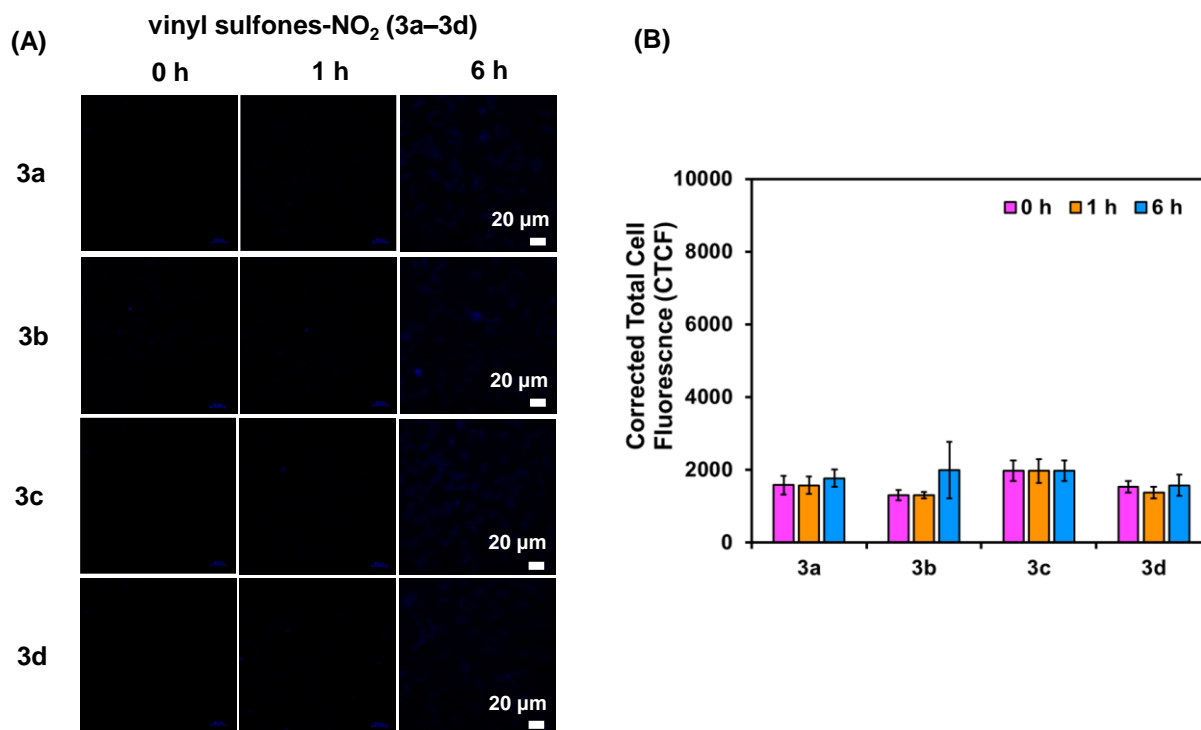

**Fig. S10.** (A) Confocal images of HepG2 cells incubated with vinyl sulfones-NO<sub>2</sub> (3a–3d) (20 μM) for 0–6 h. Scale bar = 20 μm. (B) Corrected total cell fluorescence data qualified using ImageJ and represent the mean ± SD ( $n = 30$ ).

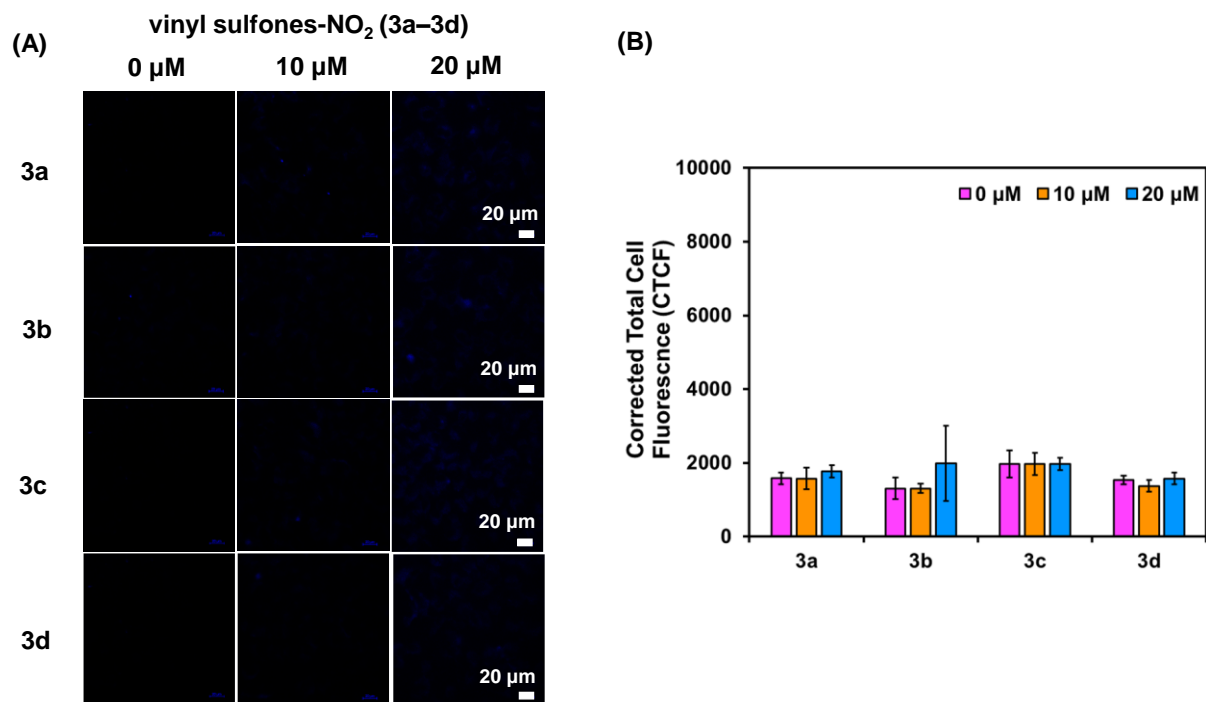

**Fig. S11.** (A) Confocal images of HepG2 cells incubated with vinyl sulfones-NO<sub>2</sub> (**3a–3d**) (0–20 μM) for 6 h and (B) Corrected total cell fluorescence data qualified using ImageJ and represent the mean ± SD (*n* = 30).



## Confocal images of HEK-293

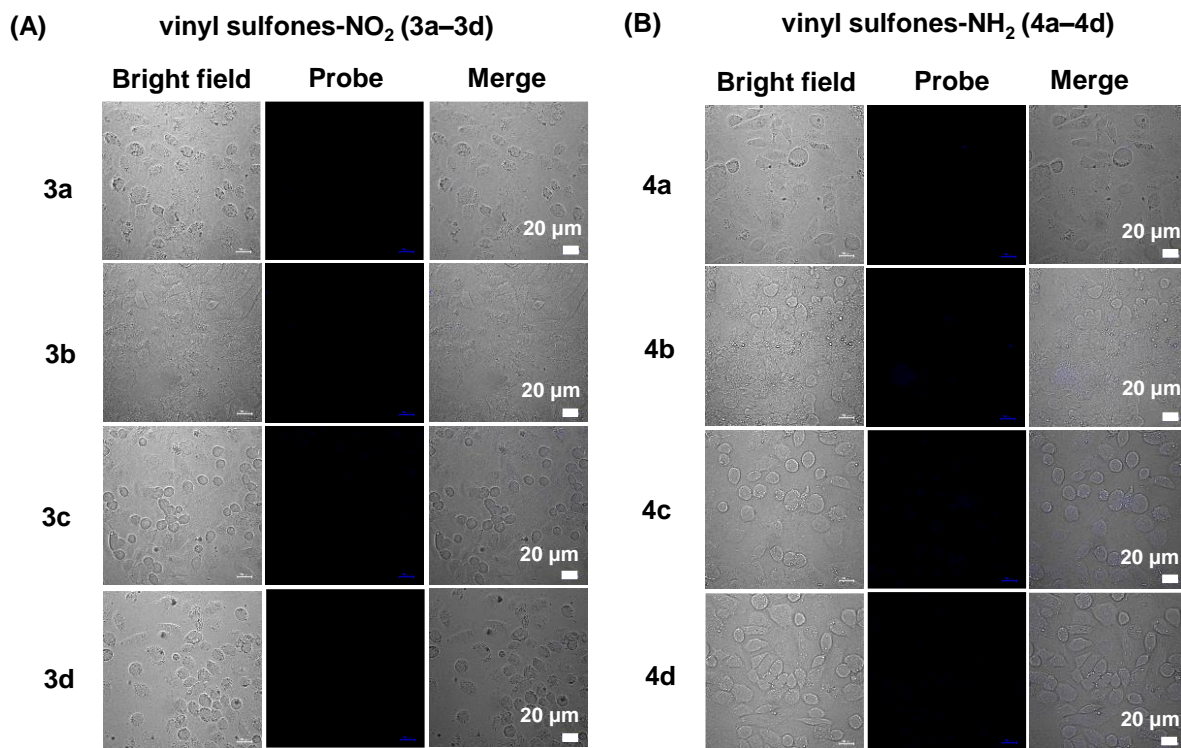

**Fig. S12.** Confocal images of HEK-293 cells incubated with (A) vinyl sulfones-NO<sub>2</sub> (**3a–3d**) and (B) vinyl sulfones-NH<sub>2</sub> (**4a–4d**) (20 μM) for 6 h.

## References

1. M. Pramanik, K. Choudhuri and P. Mal, *Asian Journal of Organic Chemistry*, 2019, **8**, 144-150.
2. Y. Xu, J. Zhao, X. Tang, W. Wu and H. Jiang, *Adv. Synth. Catal.*, 2014, **356**, 2029-2039.
